# Supplementary material for: Facile synthesis of novel spiroheterocycles via diastereoselective aziridination of cyclic enones
Source: Royal Society of Chemistry journal article supplement (doi:10.1039/c6ra28508b), 2017-01-01
Supplement: c6ra28508b1.pdf [file c6ra28508b1.pdf]

## Facile synthesis of novel spiroheterocycles *via* diastereoselective aziridination of cyclic enones

Kai-Chuan Yang,<sup>a,b,c</sup> Jun-Long Li,<sup>\*a,b</sup> Xu-Dong Shen,<sup>b</sup> Qiang Li,<sup>b</sup> Hai-Jun Leng,<sup>b</sup> Qian Huang,<sup>b</sup>  
Peng-Kun Zheng,<sup>b</sup> Xiao-Jun Gou,<sup>\*b</sup> and Yong-Gang Zhi<sup>\*a,c</sup>

- a. *Chengdu Institute of Organic Chemistry, Chinese Academy of Sciences, Chengdu 610041, PR China. E-mail: zygggroup@hotmail.com*
- b. *Antibiotics Innovation and Advanced Manufacturing Key Laboratory of Sichuan Province, Sichuan Industrial Institute of Antibiotics, Chengdu University, Chengdu 610052, PR China. E-mail: lijunlong709@hotmail.com; gouxj@163.com*
- c. *University of Chinese Academy of Science, Beijing 100049, PR China.*

### Supporting Information

#### Table of Contents

1. General Information
2. Procedure for the Optimization of the Reaction Conditions
3. General Procedure for the Synthesis of Spiroaziridines Products **4** and **5**
4. Procedure for the Asymmetric Synthesis of chiral **5a**
5. Procedure for Synthetic Transformations of **5a**
6. Procedure for Trifluoromethylation of Spiroaziridine Product **4a**
7. Crystal Data and Structure Refinement for the Representative Product **5d**
8. Procedure for *in vitro* Minimum Inhibitory Concentration Assay
9. References and Notes
10. NMR and HPLC Spectra of the Spiroaziridines **4a** and **5**

## 1. General Information

**General Procedures.** All reactions were performed in oven-dried or flame-dried reaction vessels, modified Schlenk flasks, or round-bottom flasks. The flasks were fitted with Teflon screw caps and reactions were conducted under an atmosphere of argon if needed. Gas-tight syringes with stainless steel needles were used to transfer air- and moisture-sensitive liquids. All moisture and/or air sensitive solid compounds were manipulated inside normal desiccators. Flash column chromatography was performed using silica gel (40–63  $\mu\text{m}$ , 230–400 mesh).

Analytical thin layer chromatography (TLC) was performed on silica gel 60 F<sub>254</sub> aluminum plates (Merck) containing a 254 nm fluorescent indicator. TLC plates were visualized by exposure to short wave ultraviolet light (254 nm) and to a solution of  $\text{KMnO}_4$  (1 g of  $\text{KMnO}_4$ , 6 g of  $\text{K}_2\text{CO}_3$  and 0.1 g of  $\text{KOH}$  in 100 mL of  $\text{H}_2\text{O}$ ) or vanillin (2 g of vanillin and 4 mL of concentrated  $\text{H}_2\text{SO}_4$  in 100 mL of  $\text{EtOH}$ ) followed by heating.

Organic solutions were concentrated at 30–50  $^\circ\text{C}$  on rotary evaporators at  $\sim 10$  torr followed by drying on vacuum pump at  $\sim 1$  torr. Reaction temperatures are reported as the temperature of the bath surrounding the vessel unless otherwise stated.

**Materials.** Commercial reagents and solvents were obtained from Adamas-beta, Aldrich Chemical Co., Alfa Aesar, Macklin and Energy Chemical and used as received with the following exceptions: THF and toluene were purified by refluxing over Na-benzophenone under positive argon pressure followed by distillation.<sup>[1]</sup> The enone substrates were prepared according to literature procedure.<sup>[2]</sup>

### **Instrumentation.**

• Proton nuclear magnetic resonance ( $^1\text{H}$  NMR) spectra were recorded with Bruker AV 300 MHz or 400 MHz spectrometer. Proton chemical shifts are reported in parts per million ( $\delta$  scale), and are referenced using residual protium in the NMR solvents ( $\text{CDCl}_3$ :  $\delta$  7.26 ( $\text{CHCl}_3$ ) and  $\delta$  2.50 ( $\text{DMSO}-d_6$ )). Data are reported as follows: chemical shift [multiplicity (s = singlet, d = doublet, t = triplet, q = quartet, m = multiplet, br s = broad singlet), coupling constant(s) (Hz), integration].

• Carbon-13 nuclear magnetic resonance ( $^{13}\text{C}$  NMR) spectra were recorded with Bruker AV 300 MHz or 400 MHz spectrometers. Carbon chemical shifts are reported in parts per million ( $\delta$  scale), and are referenced using the carbon resonances of the solvent ( $\delta$  77.16 ( $\text{CHCl}_3$ ), 39.52 ( $\text{DMSO}$ )). Data are reported as follows: chemical shift [multiplicity (if not singlet), assignment ( $\text{C}_q$  = fully substituted carbon)].

• High resolution mass spectra (HRMS) were recorded on a Waters SYNAPT G2 using an electrospray (ESI) ionization source.

## 2. Procedure for the Optimization of the Reaction Conditions

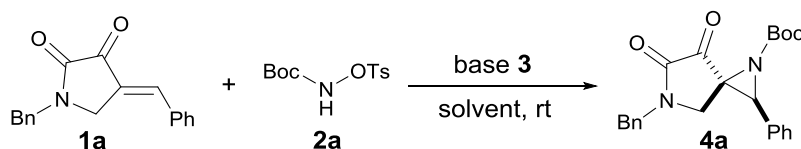

A dried glass tube was charged with 1-benzyl-4-benzylidenepyrrolidine-2,3-dione **1a** (0.1 mmol, 27.7 mg) and *tert*-butyl (tosyloxy)carbamate **2a** (0.15 mmol, 43.1 mg) in an indicated solvent (0.1 M, 1 mL). Then Base **3** (base loading shown in Table 1 in the paper) was added to the reaction mixture, and the reaction was stirred at room temperature overnight. When the reaction was complete, the reaction mixture was concentrated and the residue was purified by flash chromatography on silica gel eluting with petroleum ether/ethyl acetate (6:1 to 4:1) to afford the corresponding spiroaziridine product **4a**, which was further characterized by <sup>1</sup>H-NMR, <sup>13</sup>C-HMR and HRMS analysis.

### tert-butyl-5-benzyl-6,7-dioxo-2-phenyl-1,5-diazaspiro[2.4]heptane-1-carboxylate **4a**

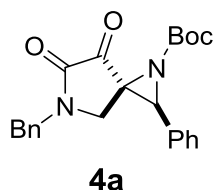

Prepared according to the general procedure using 1-benzyl-4-benzylidenepyrrolidine-2,3-dione **1a** (0.1 mmol, 27.7 mg) and *tert*-butyl (tosyloxy)carbamate **2a** (0.15 mmol, 43.1 mg). After the reaction was complete, purification of the crude product via column chromatography delivered **4a** as a white solid with 93% yield.

*NMR and HRMS data for the product 4a:*

**<sup>1</sup>H NMR (300 MHz, DMSO-*d*<sub>6</sub>):** δ (ppm): 7.41 – 7.18 (m, 10H), 4.75 (d, *J* = 14.7 Hz, 1H), 4.54 (d, *J* = 14.7 Hz, 1H), 4.10 (s, 1H), 3.52 (d, *J* = 11.7 Hz, 1H), 3.11 (d, *J* = 11.7 Hz, 1H), 1.39 (s, 9H).

**<sup>13</sup>C NMR (75 MHz, DMSO-*d*<sub>6</sub>):** δ (ppm): 192.8, 158.5, 157.2, 135.2, 133.1, 128.7, 128.6, 128.5, 127.8, 127.7, 127.2, 82.3, 50.5, 48.8, 47.0, 44.3, 27.5.

**HRMS (ESI):** *m/z* calculated for C<sub>23</sub>H<sub>24</sub>N<sub>2</sub>O<sub>4</sub>Na<sup>+</sup>: 415.1634, found: 415.1633.

### 3. General Procedure for the Synthesis of spiroaziridines products 4 and 5

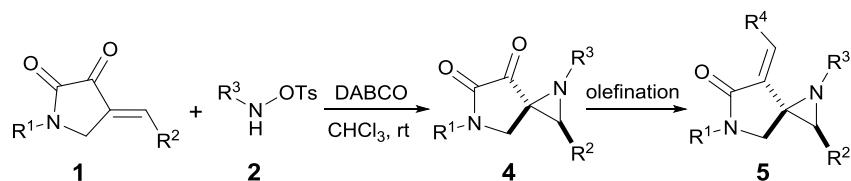

A dried glass tube was charged with pyrrolidine-2,3-dione **1** (0.2 mmol) and **2** (0.3 mmol) in 2 mL of CHCl<sub>3</sub>, DABCO (0.3 mmol, 33.7 mg) was added then. The reaction was sealed with a Teflon cap and stirred at room temperature overnight. When the reaction was complete, the reaction mixture was concentrated and the residue was purified by flash chromatography on silica gel (petroleum ether/ethyl acetate = 6:1 to 4:1) to afford the corresponding spiroaziridine products **4**, which was used for the next step.

A glass tube was charged with *t*-BuOK (1.0 equiv.) and (EtO)<sub>2</sub>POCH<sub>2</sub>CO<sub>2</sub>Et (ethyl 2-(diethoxyphosphoryl)acetate) (1.0 equiv.) in 1 mL of anhydrous THF, and the reaction was stirred at 0 °C for about 20 minutes, then the spiroaziridines **4** was added to the reaction mixture and stirred at room temperature for about 1 hour until the reaction was complete. The reaction mixture was concentrated and the residue was purified by flash chromatography on silica gel (petroleum ether/ethyl acetate = 6:1 to 5:1) to afford the corresponding desired products **5**.

#### tert-butyl-5-benzyl-7-(2-ethoxy-2-oxoethylidene)-6-oxo-2-phenyl-1,5-diazaspiro[2.4]heptane-1-carboxylate 5a:

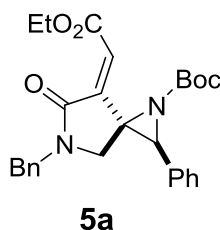

Prepared according to the general procedure using 1-benzyl-4-benzylidenepyrrolidine-2,3-dione **1a** (0.2 mmol, 55.4 mg) and *tert*-butyl(tosyloxy)carbamate **2a** (0.3 mmol, 86.2 mg) in 2 mL of CHCl<sub>3</sub>. After the reaction was complete, purification of the crude product via column chromatography delivered **4a** as a white solid with 93% yield. The isolated yield of the HWE transformation was determined to be 91% yield.

*NMR and HRMS data for the product 5a:*

<sup>1</sup>H NMR (400 MHz, CDCl<sub>3</sub>): δ (ppm): 7.34 – 7.23 (m, 8H), 7.17 – 7.14 (m, 2H), 5.94 (s, 1H), 4.80 (d, *J* = 15.2 Hz, 1H), 4.37 (q, *J* = 7.2 Hz, 2H), 4.24 (d, *J* = 15.2 Hz, 1H), 3.93 (s, 1H), 3.24 (d, *J* = 11.2 Hz, 1H), 2.90 (d, *J* = 11.2 Hz, 1H), 1.52 (s, 9H), 1.37 (t, *J* = 7.2 Hz, 3H).

<sup>13</sup>C NMR (100 MHz, CDCl<sub>3</sub>): δ (ppm): 165.9, 163.7, 158.1, 135.3, 134.8, 133.5, 128.9, 128.8, 128.5, 127.9, 127.0, 121.6, 83.4, 61.9, 49.6, 48.4, 48.1, 46.7, 28.1, 14.2.

**HRMS (ESI):**  $m/z$  calculated for  $C_{27}H_{30}N_2O_5Na^+$ : 485.2052, found: 485.2051.

**tert-butyl-5-benzyl-7-(2-ethoxy-2-oxoethylidene)-2-(4-fluorophenyl)-6-oxo-1,5-diazaspiro[2.4]heptane-1-carboxylate 5b**

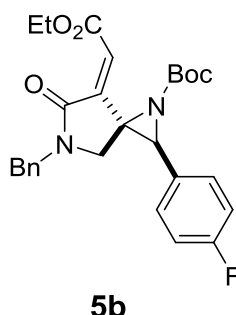

Prepared according to the general procedure using 1-benzyl-4-(4-fluorobenzylidene)pyrrolidine-2,3-dione **1b** (0.2 mmol, 59.0 mg) and *tert*-butyl (tosyloxy)carbamate **2a** (0.3 mmol, 86.2 mg) in 2 mL of  $CHCl_3$ . After the reaction was complete, purification of the crude product via column chromatography delivered **4b** as a white solid with 87% yield. The isolated yield of the HWE transformation was determined to be 88% yield.

*NMR and HRMS data for the product 5b:*

**$^1H$  NMR (400 MHz,  $CDCl_3$ ):**  $\delta$  (ppm): 7.32 – 7.26 (m, 3H), 7.24 – 7.19 (m, 2H), 7.16 (dd,  $J$  = 7.6, 2.0 Hz, 2H), 7.00 (t,  $J$  = 8.6 Hz, 2H), 5.93 (s, 1H), 4.77 (d,  $J$  = 14.8 Hz, 1H), 4.37 (q,  $J$  = 7.2 Hz, 2H), 4.28 (d,  $J$  = 14.8 Hz, 1H), 3.90 (s, 1H), 3.21 (d,  $J$  = 11.2 Hz, 1H), 2.87 (d,  $J$  = 11.2 Hz, 1H), 1.52 (s, 9H), 1.37 (t,  $J$  = 7.2 Hz, 3H).

**$^{13}C$  NMR (100 MHz,  $CDCl_3$ ):**  $\delta$  (ppm): 165.8, 163.6, 158.0, 135.3, 134.6, 129.3, 128.9, 128.7, 128.0, 121.7, 115.9, 115.7, 83.6, 61.9, 48.9, 48.2, 48.1, 46.8, 28.1, 14.2.

**HRMS (ESI):**  $m/z$  calculated for  $C_{27}H_{29}FN_2O_5Na^+$ : 503.1958, found: 503.1961.

**tert-butyl-5-benzyl-2-(4-chlorophenyl)-7-(2-ethoxy-2-oxoethylidene)-6-oxo-1,5-diazaspiro[2.4]heptane-1-carboxylate 5c**

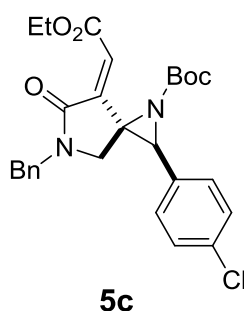

Prepared according to the general procedure using 1-benzyl-4-(4-chlorobenzylidene)pyrrolidine-2,3-dione **1c** (0.2 mmol, 62.4 mg) and *tert*-butyl (tosyloxy)carbamate **2a** (0.3 mmol, 86.2 mg) in 2 mL of  $CHCl_3$ . After the reaction was complete, purification of the crude

product via column chromatography delivered **4c** as a white solid with 89% yield. The isolated yield of the HWE transformation was determined to be 91% yield.

*NMR and HRMS data for the product 5c:*

**<sup>1</sup>H NMR (400 MHz, CDCl<sub>3</sub>):** δ (ppm): 7.32 – 7.26 (m, 5H), 7.20 – 7.14 (m, 4H), 5.94 (s, 1H), 4.78 (d, *J* = 14.8 Hz, 1H), 4.37 (q, *J* = 7.2 Hz, 2H), 4.26 (d, *J* = 14.8 Hz, 1H), 4.26 (d, *J* = 14.8 Hz, 1H), 3.20 (d, *J* = 11.2 Hz, 1H), 2.86 (d, *J* = 11.2 Hz, 1H), 1.52 (s, 9H), 1.37 (t, *J* = 7.2 Hz, 3H).

**<sup>13</sup>C NMR (100 MHz, CDCl<sub>3</sub>):** δ (ppm): 165.7, 163.5, 157.9, 135.2, 134.5, 132.1, 129.1, 129.0, 128.9, 128.3, 128.0, 127.9, 121.8, 83.6, 61.9, 48.8, 48.2, 48.1, 46.7, 28.0, 14.1.

**HRMS (ESI):** *m/z* calculated for C<sub>27</sub>H<sub>29</sub>ClN<sub>2</sub>O<sub>5</sub>Na<sup>+</sup>: 519.1663, found: 519.1663.

**tert-butyl-5-benzyl-2-(4-bromophenyl)-7-(2-ethoxy-2-oxoethylidene)-6-oxo-1,5-diazaspiro[2.4]heptane-1-carboxylate 5d**

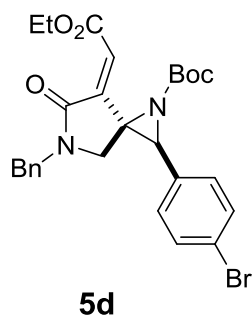

Prepared according to the general procedure using 1-benzyl-4-(4-bromobenzylidene)pyrrolidine-2,3-dione **1d** (0.2 mmol, 71.2 mg) and *tert*-butyl (tosyloxy)carbamate **2a** (0.3 mmol, 86.2 mg) in 2 mL of CHCl<sub>3</sub>. After the reaction was complete, purification of the crude product via column chromatography delivered **4d** as a white solid with 88% yield. The isolated yield of the HWE transformation was determined to be 89% yield.

*NMR and HRMS data for the product 5d:*

**<sup>1</sup>H NMR (400 MHz, CDCl<sub>3</sub>):** δ (ppm): 7.47 – 7.42 (m, 2H), 7.31 – 7.25 (m, 3H), 7.18 – 7.10 (m, 4H), 5.93 (s, 1H), 4.78 (d, *J* = 15.2 Hz, 1H), 4.37 (q, *J* = 7.2 Hz, 2H), 4.26 (d, *J* = 14.8 Hz, 1H), 3.88 (s, 1H), 3.20 (d, *J* = 11.2 Hz, 1H), 2.86 (d, *J* = 11.2 Hz, 1H), 1.52 (s, 9H), 1.36 (t, *J* = 7.2 Hz, 3H).

**<sup>13</sup>C NMR (100 MHz, CDCl<sub>3</sub>):** δ (ppm): 165.7, 163.6, 157.9, 135.3, 134.5, 132.6, 132.0, 129.0, 128.7, 128.0, 122.7, 121.8, 83.7, 61.9, 48.9, 48.3, 48.1, 46.8, 28.1, 14.2.

**HRMS (ESI):** *m/z* calculated for C<sub>27</sub>H<sub>29</sub>BrN<sub>2</sub>O<sub>5</sub>Na<sup>+</sup>: 563.1158, found: 563.1158.

**tert-butyl-5-benzyl-7-(2-ethoxy-2-oxoethylidene)-2-(4-nitrophenyl)-6-oxo-1,5-diazaspiro[2.4]heptane-1-carboxylate 5e**

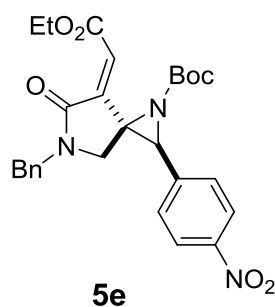

Prepared according to the general procedure using 1-benzyl-4-(4-nitrobenzylidene)pyrrolidine-2,3-dione **1e** (0.2 mmol, 64.4 mg) and *tert*-butyl (tosyloxy)carbamate **2a** (0.3 mmol, 86.2 mg) in 2 mL of CHCl<sub>3</sub>. After the reaction was complete, purification of the crude product via column chromatography delivered **4e** as a white solid with 89% yield. The isolated yield of the HWE transformation was determined to be 90% yield.

*NMR and HRMS data for the product 5e:*

<sup>1</sup>H NMR (400 MHz, CDCl<sub>3</sub>): δ (ppm): 8.21 – 8.17 (m, 2H), 7.47 – 7.42 (m, 2H), 7.32 – 7.26 (m, 3H), 7.18 – 7.12 (m, 2H), 5.98 (s, 1H), 4.74 (d, *J* = 14.8 Hz, 1H), 4.38 (q, *J* = 7.2 Hz, 2H), 4.30 (d, *J* = 15.2 Hz, 1H), 4.01 (s, 1H), 3.23 (d, *J* = 11.2 Hz, 1H), 2.81 (d, *J* = 11.2 Hz, 1H), 1.53 (s, 9H), 1.37 (t, *J* = 7.2 Hz, 3H).

<sup>13</sup>C NMR (100 MHz, CDCl<sub>3</sub>): δ (ppm): 165.5, 163.3, 157.6, 148.1, 140.8, 135.1, 134.0, 129.1, 129.0, 128.1, 128.0, 124.1, 122.3, 84.1, 62.0, 48.6, 48.5, 48.2, 46.8, 28.0, 14.2.

HRMS (ESI): *m/z* calculated for C<sub>27</sub>H<sub>29</sub>N<sub>3</sub>O<sub>7</sub>Na<sup>+</sup>: 530.1903, found: 530.1905.

**tert-butyl-5-benzyl-2-(3-chlorophenyl)-7-(2-ethoxy-2-oxoethylidene)-6-oxo-1,5-diazaspiro[2.4]heptane-1-carboxylate 5f**

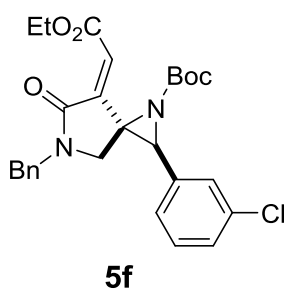

Prepared according to the general procedure using 1-benzyl-4-(3-chlorobenzylidene)pyrrolidine-2,3-dione **1f** (0.2 mmol, 62.4 mg) and *tert*-butyl (tosyloxy)carbamate **2a** (0.3 mmol, 86.2 mg) in 2 mL of CHCl<sub>3</sub>. After the reaction was complete, purification of the crude product via column chromatography delivered **4f** as a white solid with 85% yield. The isolated yield of the HWE transformation was determined to be 89% yield.

*NMR and HRMS data for the product 5f:*

**<sup>1</sup>H NMR (400 MHz, CDCl<sub>3</sub>):** δ (ppm): 7.33 – 7.23 (m, 6H), 7.18 – 7.12 (m, 3H), 5.94 (s, 1H), 4.78 (d, *J* = 15.2 Hz, 1H), 4.37 (q, *J* = 7.2 Hz, 2H), 4.27 (d, *J* = 15.2 Hz, 1H), 3.91 (s, 1H), 3.23 (d, *J* = 11.2 Hz, 1H), 2.89 (d, *J* = 11.2 Hz, 1H), 1.52 (s, 9H), 1.37 (t, *J* = 7.2 Hz, 3H).

**<sup>13</sup>C NMR (100 MHz, CDCl<sub>3</sub>):** δ (ppm): 165.6, 163.5, 157.8, 135.6, 135.2, 134.8, 134.4, 130.1, 128.9, 128.7, 127.9, 127.8, 126.9, 125.3, 121.8, 83.6, 61.8, 48.6, 48.2, 48.2, 46.7, 28.0, 14.1.

**HRMS (ESI):** *m/z* calculated for C<sub>27</sub>H<sub>29</sub>ClN<sub>2</sub>O<sub>5</sub>Na<sup>+</sup>: 519.1663, found: 519.1664.

**tert-butyl-5-benzyl-2-(3-bromophenyl)-7-(2-ethoxy-2-oxoethylidene)-6-oxo-1,5-diazaspiro[2.4]heptane-1-carboxylate 5g**

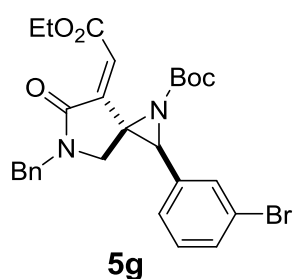

Prepared according to the general procedure using 1-benzyl-4-(3-bromobenzylidene)pyrrolidine-2,3-dione **1g** (0.2 mmol, 71.2 mg) and *tert*-butyl (tosyloxy)carbamate **2a** (0.3 mmol, 86.2 mg) in 2 mL of CHCl<sub>3</sub>. After the reaction was complete, purification of the crude product via column chromatography delivered **4g** as a white solid with 87% yield. The isolated yield of the HWE transformation was determined to be 91% yield.

*NMR and HRMS data for the product 5g:*

**<sup>1</sup>H NMR (400 MHz, CDCl<sub>3</sub>):** δ (ppm): 7.44 – 7.39 (m, 2H), 7.33 – 7.25 (m, 3H), 7.21 – 7.13 (m, 4H), 5.93 (s, 1H), 4.78 (d, *J* = 15.2 Hz, 1H), 4.37 (q, *J* = 7.2 Hz, 2H), 4.28 (d, *J* = 15.2 Hz, 1H), 3.90 (s, 1H), 3.23 (d, *J* = 11.2 Hz, 1H), 2.89 (d, *J* = 11.2 Hz, 1H), 1.52 (s, 9H), 1.37 (t, *J* = 7.2 Hz, 3H).

**<sup>13</sup>C NMR (100 MHz, CDCl<sub>3</sub>):** δ (ppm): 165.7, 163.5, 157.8, 135.9, 135.2, 134.4, 131.7, 130.4, 129.8, 128.9, 128.0, 127.9, 125.8, 123.0, 121.9, 83.7, 61.9, 48.6, 48.3, 48.2, 46.7, 28.0, 14.1.

**HRMS (ESI):** *m/z* calculated for C<sub>27</sub>H<sub>29</sub>BrN<sub>2</sub>O<sub>5</sub>Na<sup>+</sup>: 563.1158, found: 563.1160.



**tert-butyl-5-benzyl-2-(2-chlorophenyl)-7-(2-ethoxy-2-oxoethylidene)-6-oxo-1,5-diazaspiro[2.4]heptane-1-carboxylate 5h**

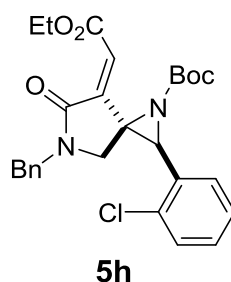

Prepared according to the general procedure using 1-benzyl-4-(2-chlorobenzylidene)pyrrolidine-2,3-dione **1h** (0.2 mmol, 62.4 mg) and *tert*-butyl (tosyloxy)carbamate **2a** (0.3 mmol, 86.2 mg) in 2 mL of CHCl<sub>3</sub>. After the reaction was complete, purification of the crude product via column chromatography delivered **4h** as a white solid with 81% yield. The isolated yield of the HWE transformation was determined to be 84% yield.

*NMR and HRMS data for the product 5h:*

**<sup>1</sup>H NMR (400 MHz, CDCl<sub>3</sub>):** δ (ppm): 7.35 – 7.18 (m, 7H), 7.17 – 7.14 (m, 2H), 6.00 (s, 1H), 4.79 (d, *J* = 15.2 Hz, 1H), 4.37 (q, *J* = 7.2 Hz, 2H), 4.28 (d, *J* = 15.2 Hz, 1H), 4.08 (s, 1H), 3.07 (d, *J* = 11.2 Hz, 1H), 2.85 (d, *J* = 11.2 Hz, 1H), 1.54 (s, 9H), 1.37 (t, *J* = 7.2 Hz, 3H).

**<sup>13</sup>C NMR (100 MHz, CDCl<sub>3</sub>):** δ (ppm): 165.5, 163.6, 158.1, 135.3, 134.3, 133.9, 131.8, 129.7, 129.2, 128.8, 128.5, 127.8, 127.7, 127.0, 122.0, 83.5, 61.7, 48.4, 48.0, 47.5, 46.5, 28.0, 14.1.

**HRMS (ESI):** *m/z* calculated for C<sub>27</sub>H<sub>29</sub>ClN<sub>2</sub>O<sub>5</sub>Na<sup>+</sup>: 519.1663, found: 519.1665.

**tert-butyl-5-benzyl-2-(2,4-dichlorophenyl)-7-(2-ethoxy-2-oxoethylidene)-6-oxo-1,5-diazaspiro[2.4]heptane-1-carboxylate 5i**

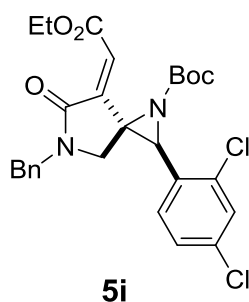

Prepared according to the general procedure using 1-benzyl-4-(2,4-dichlorobenzylidene)pyrrolidine-2,3-dione **1i** (0.2 mmol, 69.2 mg) and *tert*-butyl (tosyloxy)carbamate **2a** (0.3 mmol, 86.2 mg) in 2 mL of CHCl<sub>3</sub>. After the reaction was complete, purification of the crude product via column chromatography delivered **4i** as a white solid with 86% yield. The isolated yield of the HWE transformation was determined to be 89% yield.

*NMR and HRMS data for the product 5i:*

**<sup>1</sup>H NMR (400 MHz, CDCl<sub>3</sub>):** δ (ppm): 7.35 (d, *J* = 2.0 Hz, 1H), 7.31 – 7.25 (m, 4H), 7.20 – 7.15 (m, 3H), 6.00 (s, 1H), 4.78 (d, *J* = 15.2 Hz, 1H), 4.37 (q, *J* = 7.2 Hz, 2H), 4.29 (d, *J* = 15.2 Hz, 1H), 4.03 (s, 1H), 3.06 (d, *J* = 11.2 Hz, 1H), 2.83 (d, *J* = 11.2 Hz, 1H), 1.53 (s, 9H), 1.36 (t, *J* = 7.2 Hz, 3H).

**<sup>13</sup>C NMR (100 MHz, CDCl<sub>3</sub>):** δ (ppm): 165.3, 163.4, 157.8, 135.1, 135.0, 134.5, 134.0, 130.6, 129.4, 129.1, 128.8, 127.8, 127.7, 127.4, 122.1, 83.6, 61.7, 48.3, 48.0, 46.8, 46.5, 27.9, 14.1.

**HRMS (ESI):** *m/z* calculated for C<sub>27</sub>H<sub>28</sub>Cl<sub>2</sub>N<sub>2</sub>O<sub>5</sub>Na<sup>+</sup>: 553.1273, found: 553.1270.

**tert-butyl-5-benzyl-7-(2-ethoxy-2-oxoethylidene)-6-oxo-2-(*p*-tolyl)-1,5-diazaspiro[2.4]heptane-1-carboxylate 5j**

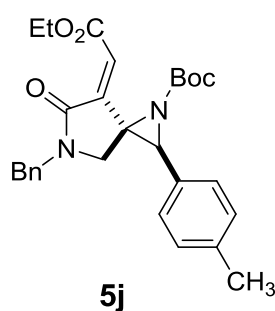

Prepared according to the general procedure using 1-benzyl-4-(4-methylbenzylidene)pyrrolidine-2,3-dione **1j** (0.2 mmol, 58.2 mg) and *tert*-butyl (tosyloxy)carbamate **2a** (0.3 mmol, 86.2 mg) in 2 mL of CHCl<sub>3</sub>. After the reaction was complete, purification of the crude product via column chromatography delivered **4j** as a white solid with 90% yield. The isolated yield of the HWE transformation was determined to be 89% yield.

*NMR and HRMS data for the product 5j:*

**<sup>1</sup>H NMR (400 MHz, CDCl<sub>3</sub>):** δ (ppm): 7.25 – 7.16 (m, 3H), 7.10 – 7.03 (m, 6H), 5.85 (s, 1H), 4.74 (d, *J* = 15.2 Hz, 1H), 4.30 (q, *J* = 7.2 Hz, 2H), 4.15 (d, *J* = 15.2 Hz, 1H), 3.82 (s, 1H), 3.16 (d, *J* = 11.2 Hz, 1H), 3.16 (d, *J* = 11.2 Hz, 1H), 2.25 (s, 3H), 1.45 (s, 9H), 1.29 (t, *J* = 7.2 Hz, 3H).

**<sup>13</sup>C NMR (100 MHz, CDCl<sub>3</sub>):** δ (ppm): 165.9, 163.8, 158.2, 138.3, 135.4, 134.9, 130.5, 129.4, 128.9, 127.9, 126.9, 121.5, 83.3, 61.8, 49.5, 48.4, 48.0, 46.7, 28.1, 21.3, 14.2.

**HRMS (ESI):** *m/z* calculated for C<sub>28</sub>H<sub>32</sub>N<sub>2</sub>O<sub>5</sub>Na<sup>+</sup>: 499.2209, found: 499.2209.

**tert-butyl-5-benzyl-7-(2-ethoxy-2-oxoethylidene)-6-oxo-2-(*m*-tolyl)-1,5-diazaspiro[2.4]heptane-1-carboxylate 5k**

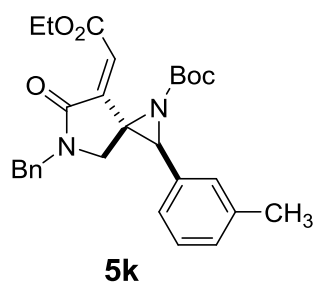

Prepared according to the general procedure using 1-benzyl-4-(3-methylbenzylidene)pyrrolidine-2,3-dione **1k** (0.2 mmol, 58.2 mg) and *tert*-butyl (tosyloxy)carbamate **2a** (0.3 mmol, 86.2 mg) in 2 mL of CHCl<sub>3</sub>. After the reaction was complete, purification of the crude product via column chromatography delivered **4k** as a white solid with 88% yield. The isolated yield of the HWE transformation was determined to be 90% yield.

*NMR and HRMS data for the product 5k:*

**<sup>1</sup>H NMR (400 MHz, CDCl<sub>3</sub>):** δ (ppm): 7.18 – 7.10 (m, 3H), 7.08 – 6.99 (m, 3H), 6.97 – 6.87 (m, 3H), 5.79 (s, 1H), 4.66 (d, *J* = 15.2 Hz, 1H), 4.22 (q, *J* = 7.2 Hz, 2H), 4.09 (d, *J* = 15.2 Hz, 1H), 3.76 (s, 1H), 3.09 (d, *J* = 11.2 Hz, 1H), 2.77 (d, *J* = 11.2 Hz, 1H), 2.16 (s, 3H), 1.38 (s, 9H), 1.22 (t, *J* = 7.2 Hz, 3H).

**<sup>13</sup>C NMR (100 MHz, CDCl<sub>3</sub>):** δ (ppm): 165.8, 163.7, 158.2, 138.5, 135.4, 134.9, 133.4, 129.3, 129.1, 128.9, 128.6, 127.9, 127.6, 124.0, 121.6, 83.3, 61.8, 49.6, 48.4, 48.0, 46.7, 28.1, 21.5, 14.1.

**HRMS (ESI):** *m/z* calculated for C<sub>28</sub>H<sub>32</sub>N<sub>2</sub>O<sub>5</sub>Na<sup>+</sup>: 499.2209, found: 499.2207.

**tert-butyl-5-benzyl-7-(2-ethoxy-2-oxoethylidene)-2-(3-methoxyphenyl)-6-oxo-1,5-diazaspiro[2.4]heptane-1-carboxylate 5l**

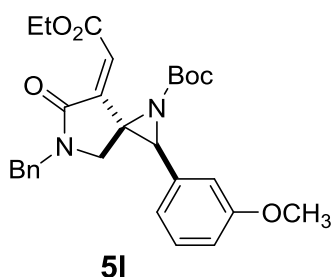

Prepared according to the general procedure using 1-benzyl-4-(3-methoxybenzylidene)pyrrolidine-2,3-dione **1l** (0.2 mmol, 61.5 mg) and *tert*-butyl (tosyloxy)carbamate **2a** (0.3 mmol, 86.2 mg) in 2 mL of CHCl<sub>3</sub>. After the reaction was complete, purification of the crude product via column chromatography delivered **4l** as a white solid with 84% yield. The isolated yield of the HWE transformation was determined to be 89% yield.

*NMR and HRMS data for the product 5l:*

**<sup>1</sup>H NMR (400 MHz, CDCl<sub>3</sub>):** δ (ppm): 7.32 – 7.14 (m, 6H), 6.85 – 6.76 (m, 3H), 5.94 (s, 1H), 4.80 (d, *J* = 14.8 Hz, 1H), 4.37 (q, *J* = 7.2 Hz, 2H), 4.24 (d, *J* = 15.2 Hz, 1H), 3.91 (s, 1H), 3.77 (s, 3H), 3.23 (d, *J* = 11.2 Hz, 1H), 2.92 (d, *J* = 11.2 Hz, 1H), 1.52 (s, 9H), 1.37 (t, *J* = 7.2 Hz, 3H).

**<sup>13</sup>C NMR (100 MHz, CDCl<sub>3</sub>):** δ (ppm): 165.8, 163.7, 159.9, 158.0, 135.3, 135.1, 134.8, 129.9, 128.9, 127.9, 121.6, 119.2, 114.4, 112.0, 83.4, 61.8, 55.4, 49.5, 48.4, 48.0, 46.7, 28.0, 14.1.

**HR-MS (ESI):** *m/z* calculated for C<sub>28</sub>H<sub>32</sub>N<sub>2</sub>O<sub>6</sub>Na<sup>+</sup>: 515.2158, found: 515.2164.

**tert-butyl-5-benzyl-7-(2-ethoxy-2-oxoethylidene)-2-(naphthalen-1-yl)-6-oxo-1,5-diazaspiro[2.4]heptane-1-carboxylate 5m**

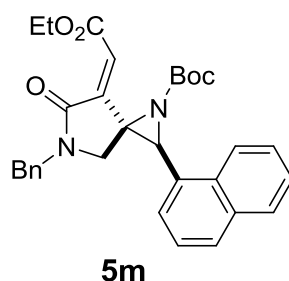

Prepared according to the general procedure using 1-benzyl-4-(naphthalen-1-ylmethylene)pyrrolidine-2,3-dione **1m** (0.2 mmol, 65.5 mg) and *tert*-butyl (tosyloxy)carbamate **2a** (0.3 mmol, 86.2 mg) in 2 mL of CHCl<sub>3</sub>. After the reaction was complete, purification of the crude product via column chromatography delivered **4m** as a white solid with 80% yield. The isolated yield of the HWE transformation was determined to be 87% yield.

*NMR and HRMS data for the product 5m:*

**<sup>1</sup>H NMR (400 MHz, CDCl<sub>3</sub>):** δ (ppm): 7.82 – 7.69 (m, 3H), 7.50 – 7.41 (m, 3H), 7.33 – 7.30 (m, 1H), 7.09 – 7.03 (m, 3H), 6.96 – 6.90 (m, 2H), 6.04 (s, 1H), 4.63 (d, *J* = 15.2 Hz, 1H), 4.33 (q, *J* = 7.2 Hz, 2H), 4.30 (s, 1H), 4.07 (d, *J* = 15.2 Hz, 1H), 3.00 (d, *J* = 11.2 Hz, 1H), 2.60 (d, *J* = 11.2 Hz, 1H), 1.49 (s, 9H), 1.32 (t, *J* = 7.2 Hz, 3H).

**<sup>13</sup>C NMR (100 MHz, CDCl<sub>3</sub>):** δ (ppm): 165.7, 163.7, 158.5, 135.1, 134.9, 133.4, 131.3, 129.6, 128.9, 128.7, 127.7, 127.6, 127.2, 126.4, 125.5, 125.0, 122.7, 121.8, 83.4, 61.9, 48.4, 48.1, 48.1, 46.5, 28.1, 14.2.

**HRMS (ESI):** *m/z* calculated for C<sub>31</sub>H<sub>32</sub>N<sub>2</sub>O<sub>5</sub>Na<sup>+</sup>: 535.2209, found: 535.2208.

**tert-butyl-5-benzyl-7-(2-ethoxy-2-oxoethylidene)-2-(naphthalen-2-yl)-6-oxo-1,5-diazaspiro[2.4]heptane-1-carboxylate 5n**

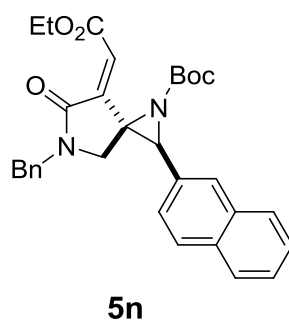

Prepared according to the general procedure using 1-benzyl-4-(naphthalen-2-ylmethylene) pyrrolidine-2,3-dione **1n** (0.2 mmol, 65.5 mg) and *tert*-butyl (tosyloxy)carbamate **2a** (0.3 mmol, 86.2 mg) in 2 mL of CHCl<sub>3</sub>. After the reaction was complete, purification of the crude product via column chromatography delivered **4n** as a white solid with 86% yield. The isolated yield of the HWE transformation was determined to be 90% yield.

*NMR and HRMS data for the product 5n:*

**<sup>1</sup>H NMR (400 MHz, CDCl<sub>3</sub>):** δ (ppm): 7.76 – 7.66 (m, 4H), 7.43 – 7.39 (m, 2H), 7.29 – 7.25 (m, 1H), 7.20 – 7.16 (m, 3H), 7.06 (dd, *J* = 7.6, 2.0 Hz, 2H), 5.92 (s, 1H), 4.73 (d, *J* = 15.2 Hz, 1H), 4.31 (q, *J* = 7.2 Hz, 2H), 4.11 (d, *J* = 15.2 Hz, 1H), 4.03 (s, 1H), 3.19 (d, *J* = 11.2 Hz, 1H), 2.82 (d, *J* = 11.2 Hz, 1H), 1.48 (s, 9H), 1.31 (t, *J* = 7.2 Hz, 3H).

**<sup>13</sup>C NMR (100 MHz, CDCl<sub>3</sub>):** δ (ppm): 165.8, 163.7, 158.2, 135.3, 134.8, 133.3, 133.2, 131.0, 128.9, 128.7, 128.1, 127.9, 126.7, 126.5, 126.2, 124.5, 121.7, 83.5, 61.9, 49.7, 48.5, 48.4, 46.8, 28.1, 28.0, 14.2.

**HRMS (ESI):** *m/z* calculated for C<sub>31</sub>H<sub>32</sub>N<sub>2</sub>O<sub>5</sub>Na<sup>+</sup>: 535.2209, found: 535.2206.

**tert-butyl-7-(2-ethoxy-2-oxoethylidene)-5-(4-methoxybenzyl)-6-oxo-2-phenyl-1,5-diazaspiro[2.4]heptane-1-carboxylate 5o**

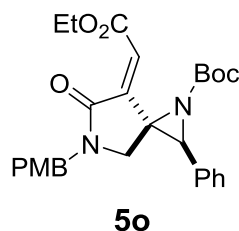

Prepared according to the general procedure using 4-benzylidene-1-(4-methoxybenzyl) pyrrolidine-2,3-dione **1o** (0.2 mmol, 61.4 mg) and *tert*-butyl (tosyloxy)carbamate **2a** (0.3 mmol, 86.2 mg) in 2 mL of CHCl<sub>3</sub>. After the reaction was complete, purification of the crude product via column chromatography delivered **4o** as a white solid with 89% yield. The isolated yield of the HWE transformation was determined to be 91% yield.

*NMR and HRMS data for the product 5o:*

**<sup>1</sup>H NMR (400 MHz, CDCl<sub>3</sub>):** δ (ppm): 7.35 – 7.21 (m, 5H), 7.10 – 7.06 (m, 2H), 6.83 – 6.78 (m, 2H), 5.93 (s, 1H), 4.71 (d, *J* = 14.8 Hz, 1H), 4.37 (q, *J* = 7.2 Hz, 2H), 4.19 (d, *J* = 14.8 Hz, 1H), 3.92 (s, 1H), 3.77 (s, 3H), 3.21 (d, *J* = 11.2 Hz, 1H), 2.87 (d, *J* = 11.2 Hz, 1H), 1.52 (s, 9H), 1.37 (t, *J* = 7.2 Hz, 3H).

**<sup>13</sup>C NMR (100 MHz, CDCl<sub>3</sub>):** δ (ppm): 165.8, 163.5, 159.3, 158.1, 134.9, 133.5, 129.3, 128.7, 128.4, 127.3, 126.9, 121.4, 114.2, 83.3, 61.8, 55.3, 49.5, 48.1, 46.1, 28.0, 14.1.

**HRMS (ESI):** *m/z* calculated for C<sub>28</sub>H<sub>32</sub>N<sub>2</sub>O<sub>6</sub>Na<sup>+</sup>: 515.2158, found: 515.2159.

**tert-butyl-5-allyl-7-(2-ethoxy-2-oxoethylidene)-6-oxo-2-phenyl-1,5-diazaspiro[2.4]heptane-1-carboxylate 5p**

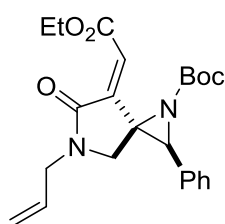

**5p**

Prepared according to the general procedure using 1-allyl-4-benzylidenepyrrolidine-2,3-dione **1p** (0.2 mmol, 61.4 mg) and *tert*-butyl (tosyloxy)carbamate **2a** (0.3 mmol, 86.2 mg) in 2 mL of CHCl<sub>3</sub>. After the reaction was complete, purification of the crude product via column chromatography delivered **4p** as a white solid with 80% yield. The isolated yield of the HWE transformation was determined to be 81% yield.

*NMR and HRMS data for the product 5p:*

**<sup>1</sup>H NMR (400 MHz, CDCl<sub>3</sub>):** δ (ppm): 7.40 – 7.28 (m, 5H), 5.91 (s, 1H), 5.74 – 5.56 (m, 1H), 5.20 – 5.09 (m, 2H), 4.35 (d, *J* = 7.2 Hz, 2H), 4.09 (m, 1H), 3.94 (s, 1H), 3.80 (m, 1H), 3.34 (d, *J* = 11.2 Hz, 1H), 2.93 (d, *J* = 11.2 Hz, 1H), 1.52 (s, 9H), 1.35 (t, *J* = 7.2 Hz, 3H).

**<sup>13</sup>C NMR (100 MHz, CDCl<sub>3</sub>):** δ (ppm): 165.9, 163.4, 158.2, 134.7, 133.6, 131.2, 128.8, 128.6, 127.0, 121.4, 118.7, 83.5, 61.8, 49.9, 48.4, 48.1, 45.4, 28.1, 14.1.

**HRMS (ESI):** *m/z* calculated for C<sub>23</sub>H<sub>28</sub>N<sub>2</sub>O<sub>5</sub>Na<sup>+</sup>: 435.1896, found: 435.1898.

**benzyl-5-benzyl-7-(2-ethoxy-2-oxoethylidene)-6-oxo-2-phenyl-1,5-diazaspiro[2.4]heptane-1-carboxylate 5q**

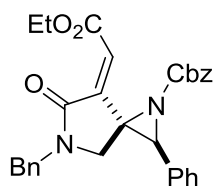

**5q**

Prepared according to the general procedure using 1-benzyl-4-benzylidenepyrrolidine-2,3-dione **1q** (0.2 mmol, 55.4 mg) and benzyl (tosyloxy)carbamate **2b** (0.3 mmol, 96.3 mg) in 2 mL of CHCl<sub>3</sub>. After the reaction was complete, purification of the crude product via column chromatography delivered **4q** as a white solid with 90% yield. The isolated yield of the HWE transformation was determined to be 91% yield.

*NMR and HRMS data for the product 5q:*

**<sup>1</sup>H NMR (400 MHz, CDCl<sub>3</sub>):** δ (ppm): 7.45 – 7.27 (m, 8H), 7.23 – 7.13 (m, 5H), 7.09 – 7.04 (m, 2H), 5.82 (s, 1H), 5.27 (d, *J* = 11.6 Hz, 1H), 5.10 (d, *J* = 11.6 Hz, 1H), 4.69 (d, *J* = 14.8 Hz, 1H), 4.36 (m, 2H), 4.24 (d, *J* = 14.8 Hz, 1H), 3.99 (s, 1H), 3.24 (d, *J* = 11.2 Hz, 1H), 2.88 (d, *J* = 11.2 Hz, 1H), 1.36 (t, *J* = 7.2 Hz, 3H).

**<sup>13</sup>C NMR (100 MHz, CDCl<sub>3</sub>):** δ (ppm): 165.6, 163.4, 159.3, 135.1, 135.0, 134.7, 132.9, 129.1, 128.8, 128.7, 128.6, 127.8, 126.9, 121.3, 69.2, 61.8, 50.3, 48.3, 47.9, 46.7, 14.1.

**HRMS (ESI):** *m/z* calculated for C<sub>30</sub>H<sub>28</sub>N<sub>2</sub>O<sub>5</sub>Na<sup>+</sup>: 519.1896, found: 519.1899.

**tert-butyl-5-benzyl-7-methylene-6-oxo-2-phenyl-1,5-diazaspiro[2.4]heptane-1-carboxylate 5r**

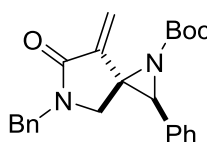

**5r**

Prepared according to the general procedure using 1-benzyl-4-benzylidenepyrrolidine-2,3-dione **1r** (0.2 mmol, 55.4 mg) and *tert*-butyl (tosyloxy)carbamate **2a** (0.3 mmol, 86.2 mg) in 2 mL of CHCl<sub>3</sub>. After the reaction was complete, purification of the crude product via column chromatography delivered **4r** as a white solid with 93% yield. The isolated yield of the Wittig transformation was determined to be 81% yield.

*NMR and HRMS data for the product 5r:*

**<sup>1</sup>H NMR (400 MHz, CDCl<sub>3</sub>):** δ (ppm): 7.33 – 7.22 (m, 8H), 7.19 – 7.15 (m, 2H), 6.21 (s, 1H), 5.26 (s, 1H), 4.84 (d, *J* = 15.2 Hz, 1H), 4.27 (d, *J* = 15.2 Hz, 1H), 3.94 (s, 1H), 3.25 (d, *J* = 11.2 Hz, 1H), 2.91 (d, *J* = 11.2 Hz, 1H), 1.46 (s, 9H).

**<sup>13</sup>C NMR (100 MHz, CDCl<sub>3</sub>):** δ (ppm): 165.9, 158.4, 137.4, 135.7, 134.0, 128.9, 128.7, 128.3, 127.9, 127.8, 127.5, 127.0, 115.5, 82.7, 49.6, 48.9, 48.3, 46.8, 28.2.

**HRMS (ESI):** *m/z* calculated for C<sub>24</sub>H<sub>26</sub>N<sub>2</sub>O<sub>3</sub>Na<sup>+</sup>: 413.1841, found: 413.1836.

#### 4. Procedure for the Asymmetric Synthesis of Chiral 5a

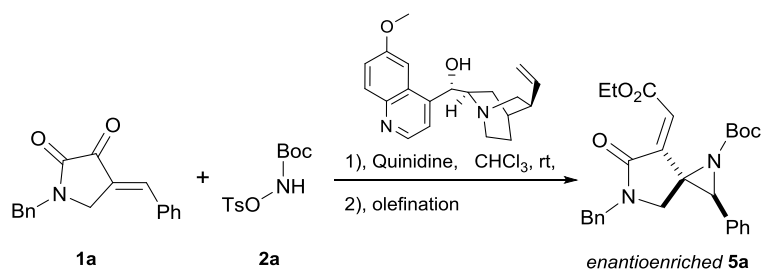

A dried glass tube was charged with 1-benzyl-4-benzylidenepyrrolidine-2,3-dione **1a** (0.2 mmol, 55.4mg), *tert*-butyl (tosyloxy)carbamate **2a** (0.3 mmol, 86.2 mg) and quinidine (0.24 mmol, 77.9 mg) in 2 mL of  $\text{CHCl}_3$ , the reaction was sealed with a Teflon cap and stirred at room temperature overnight. After the reaction was complete, purification of the crude product via column chromatography delivered the enantioenriched **4a**. The isolated yield of the final product **5a** was determined to be 82% yield for 2 steps. The diastereomeric ratio was determined to be >95:5 by  $^1\text{H}$  NMR spectroscopy of the crude reaction mixture. The enantiomeric excess of the product **5a** was determined to be 70% ee by chiral HPLC analysis on Chiralpak OD-H column (15% 2-propanol/*n*-hexane, 1 mL/min), UV 270 nm,  $t_{\text{major}} = 10.00$  min,  $t_{\text{minor}} = 15.98$  min;  $[\alpha]_{\text{D}}^{20} = +40.0$  ( $c = 4.0$  in  $\text{CH}_2\text{Cl}_2$ ).

#### 5. Procedure for Synthetic Transformations of 5a

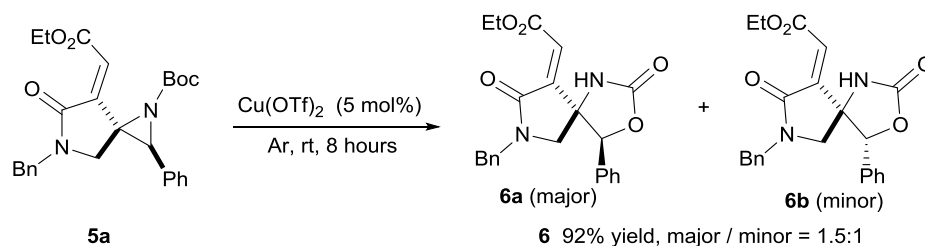

A dried glass tube was charged with **5a** (92.5 mg, 0.2 mmol),  $\text{Cu}(\text{OTf})_2$  (3.6 mg, 0.01 mmol), which were dissolved in 1 mL of dichloromethane (DCM) under argon, and the reaction was sealed with a Teflon cap and stirred at room temperature for about 8 hours. When the reaction was complete, the reaction mixture was directly purified by flash chromatography on silica gel eluting with petroleum ether/ethyl acetate (5:1 to 3:1) to afford the corresponding **6** as white solid in 92% yield with 1.5:1 d.r. The diastereoisomer could be separated by flash chromatography on silica gel, and further characterized by  $^1\text{H}$ -NMR,  $^{13}\text{C}$ -NMR and HRMS analysis, respectively. The corresponding data is listed as follows:



**ethyl (Z)-2-(7-benzyl-2,8-dioxo-4-phenyl-3-oxa-1,7-diazaspiro[4.4]nonan-9-ylidene)acetate 6**

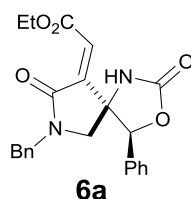

*NMR and HRMS data for the product 6a (major):*

**<sup>1</sup>H NMR (400 MHz, CDCl<sub>3</sub>):** δ (ppm): 7.37 – 7.28 (m, 3H), 7.27 – 7.18 (m, 3H), 7.18 – 7.13 (m, 2H), 7.00 – 6.88 (m, 2H), 6.67 (s, 1H), 5.89 (s, 1H), 4.97 (s, 1H), 4.44 – 4.31 (m, 3H), 4.00 (d, *J* = 14.8 Hz, 1H), 3.16 (d, *J* = 11.2 Hz, 1H), 2.99 (d, *J* = 11.2 Hz, 1H), 1.38 (t, *J* = 7.2 Hz, 3H).

**<sup>13</sup>C NMR (100 MHz, CDCl<sub>3</sub>):** δ (ppm): 165.5, 162.6, 157.5, 140.0, 134.5, 134.4, 129.6, 129.3, 128.9, 128.2, 127.9, 126.5, 126.3, 82.9, 65.8, 62.0, 51.1, 46.6, 14.1.

**HRMS (ESI):** *m/z* calculated for C<sub>23</sub>H<sub>22</sub>N<sub>2</sub>O<sub>5</sub>Na<sup>+</sup>: 429.1426, found: 429.1429.

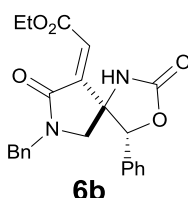

*NMR and HRMS data for the product 6b (minor):*

**<sup>1</sup>H NMR (400 MHz, CDCl<sub>3</sub>):** δ (ppm): 7.40 – 7.36 (m, 3H), 7.33 – 7.25 (m, 3H), 7.25 – 7.20 (m, 2H), 7.18 – 7.13 (m, 2H), 5.64 (s, 1H), 5.25 (s, 1H), 4.93 (s, 1H), 4.88 (d, *J* = 15.2 Hz, 1H), 4.37 (q, *J* = 7.2 Hz, 2H), 4.23 (d, *J* = 15.2 Hz, 1H), 3.58 (d, *J* = 19.6, 1H), 3.28 (d, *J* = 19.6 Hz, 1H), 1.36 (t, *J* = 7.2 Hz, 3H).

**<sup>13</sup>C NMR (100 MHz, CDCl<sub>3</sub>):** δ (ppm): 166.9, 166.3, 156.3, 149.8, 136.7, 136.6, 135.5, 128.7, 128.5, 127.8, 126.8, 126.7, 126.5, 70.5, 61.7, 57.2, 49.8, 45.1, 13.1.

**HRMS (ESI):** *m/z* calculated for C<sub>23</sub>H<sub>22</sub>N<sub>2</sub>O<sub>5</sub>Na<sup>+</sup>: 429.1426, found: 429.1425.

**6. Procedure for Trifluoromethylation of Spiroaziridine Product 4a**

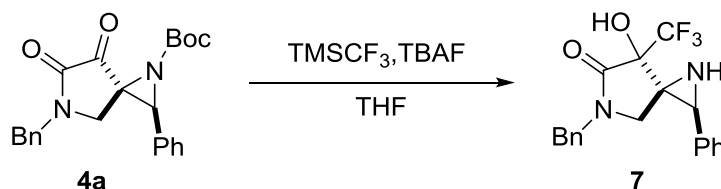

A dried glass tube was charged with **4a** (78.5 mg, 0.2 mmol), TMSCF<sub>3</sub> (36 mg, 0.25 mmol), 1 M TBAF/THF (20 μL) which were dissolved in 1 mL of anhydrous THF under argon, and the reaction was sealed with a Teflon cap and stirred at room temperature for about 3 hours. Then the reaction was cooled to 0 °C and quenched with 20 mL of 20% hydrochloric

acid. The reaction was stirred at room temperature for about 2 hours. Then the organic material was extracted with ethyl acetate, washed with brine and dried over anhydrous  $\text{Na}_2\text{SO}_4$ , then concentrated under reduced pressure and purified by flash chromatography on silica gel eluting with petroleum ether/ethyl acetate (5:1 to 2:1) to afford the corresponding **7** as white solid in 85% yield, and further characterized by  $^1\text{H-NMR}$ ,  $^{13}\text{C-NMR}$  and HRMS analysis, respectively.

**5-benzyl-7-hydroxy-2-phenyl-7-(trifluoromethyl)-1,5-diazaspiro[2.4]heptan-6-one 7**

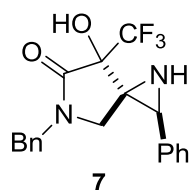

*NMR and HRMS data for the product 7*

$^1\text{H NMR}$  (400 MHz,  $\text{DMSO-}d_6$ ):  $\delta$  (ppm): 8.74 (s, 1H), 7.94 (s, 1H), 7.44 – 7.36 (m, 3H), 7.31 – 7.18 (m, 5H), 7.09 – 7.04 (m, 2H), 5.69 (s, 1H), 4.33 (d,  $J = 15.2$  Hz, 1H), 4.19 (d,  $J = 15.2$  Hz, 1H), 2.90 (d,  $J = 11.2$  Hz, 1H), 2.75 (d,  $J = 11.2$  Hz, 1H).

$^{13}\text{C NMR}$  (100 MHz,  $\text{DMSO-}d_6$ ):  $\delta$  (ppm): 165.3, 157.0, 135.1, 135.1, 129.4, 128.9, 128.6, 127.6, 127.6, 126.4, 78.3 $_{\text{CF}_3}$  ( $J = 27$  Hz), 78.0 $_{\text{CF}_3}$ , 77.8 $_{\text{CF}_3}$ , 77.5 $_{\text{CF}_3}$ , 77.3, 67.2, 51.6, 46.2.

**HRMS (ESI):**  $m/z$  calculated for  $\text{C}_{19}\text{H}_{17}\text{F}_3\text{N}_2\text{O}_2\text{H}^+$ : 363.1320, found: 363.1323.

**7. Crystal data and structure refinement for the representative product 5d**

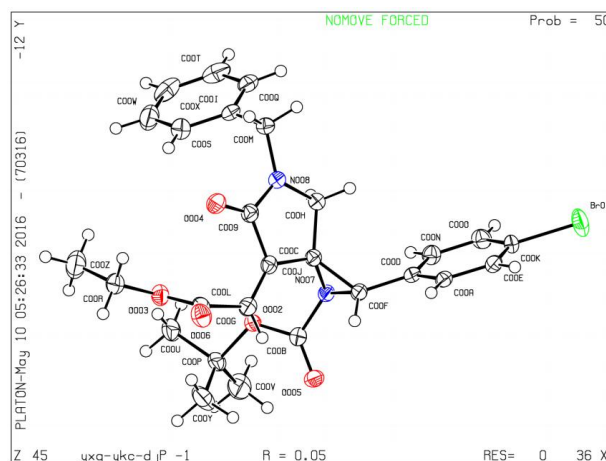

|                     |                                                    |
|---------------------|----------------------------------------------------|
| Identification code | <b>5d</b>                                          |
| Empirical formula   | $\text{C}_{27}\text{H}_{29}\text{BrN}_2\text{O}_5$ |
| Formula weight      | 541.43                                             |
| Temperature/K       | 150(40)                                            |
| Crystal system      | triclinic                                          |
| Space group         | P-1                                                |

|                                             |                                                               |
|---------------------------------------------|---------------------------------------------------------------|
| a/Å                                         | 9.8013(3)                                                     |
| b/Å                                         | 11.1877(5)                                                    |
| c/Å                                         | 13.1188(6)                                                    |
| $\alpha$ /°                                 | 99.051(4)                                                     |
| $\beta$ /°                                  | 106.017(3)                                                    |
| $\gamma$ /°                                 | 106.133(4)                                                    |
| Volume/Å <sup>3</sup>                       | 1284.88(10)                                                   |
| Z                                           | 2                                                             |
| $\rho_{\text{calc}}$ /cm <sup>3</sup>       | 1.399                                                         |
| $\mu$ /mm <sup>-1</sup>                     | 2.508                                                         |
| F(000)                                      | 560.0                                                         |
| Crystal size/mm <sup>3</sup>                | 0.75 × 0.4 × 0.3                                              |
| Radiation                                   | CuK $\alpha$ ( $\lambda$ = 1.54184)                           |
| 2 $\Theta$ range for data collection/°      | 8.506 to 134.144                                              |
| Index ranges                                | -11 ≤ h ≤ 8, -13 ≤ k ≤ 13, -15 ≤ l ≤ 15                       |
| Reflections collected                       | 13582                                                         |
| Independent reflections                     | 4589 [R <sub>int</sub> = 0.0366, R <sub>sigma</sub> = 0.0306] |
| Data/restraints/parameters                  | 4589/0/320                                                    |
| Goodness-of-fit on F <sup>2</sup>           | 1.056                                                         |
| Final R indexes [I ≥ 2 $\sigma$ (I)]        | R <sub>1</sub> = 0.0504, wR <sub>2</sub> = 0.1316             |
| Final R indexes [all data]                  | R <sub>1</sub> = 0.0520, wR <sub>2</sub> = 0.1341             |
| Largest diff. peak/hole / e Å <sup>-3</sup> | 1.00/-0.46                                                    |

## 8. Procedure for *in vitro* minimum inhibitory concentration assay

- Motivation of this study: We were inspired by the SAP core structure of the products, which has already been demonstrated to show antibacterial activity <sup>[3]</sup>. Moreover, spiro-frameworks with lactam functionalities are widely existed in the skeleton of many clinically used antibiotics such as cephalosporins. Therefore, we expected the synthesized novel spiroaziridines with  $\gamma$ -lactam functionalities would also have potential antibacterial bioactivity.
- Detailed work procedure: The minimum inhibitory concentration (MIC) of each compound was determined using a standard broth microdilution assay.<sup>[4]</sup> The procedure is that MIC data was determined by a microdilution method, following the National Committee for Clinical Laboratory Standards (NCCLS) (now called the Clinical Laboratory Standards Institute [CLSI]) The stock solutions of test compounds were diluted to give a serial, 2-fold

series, yielding final chemical concentrations that ranged from 128 to 8µg/mL. The MIC was defined as the lowest concentration of the chemical that inhibited the development of visible bacterial growth after an incubation for 16 h at 37°C.

## 9. References and notes

- [1] a) E. Krell, *Handbook of Laboratory Distillation*, Elsevier Publishing Company, Amsterdam-London-New York, **1963**; b) M. J. Rosengart, *The Technique of Distillation and Rectification in the Laboratory*, VEB Verlag Technik, Berlin, **1954**; c) H. Stage *Columns for laboratory distillation*, *Angew. Chem.*, **1947**, B19, 175.
- [2] P. L. Southwick, E. F. Barnas, *J. Org. Chem.*, **1962**, 27, 98.
- [3] M. Kidwai, S. Saxena, M. K. R. Khan, S. S. Thukral, *Bioorg. Med. Chem. Lett.*, **2005**, 15, 4295.
- [4] L. Ouyang, Y. Huang, Y. Zhao, G. He, Y. Xie, J. Liu, J. He, B. Liu, Y. Wei, *Bioorg. Med. Chem. Lett.*, **2012**, 22, 3044.

## 10. NMR and HPLC spectra of the spiroaziridines 4a and 5

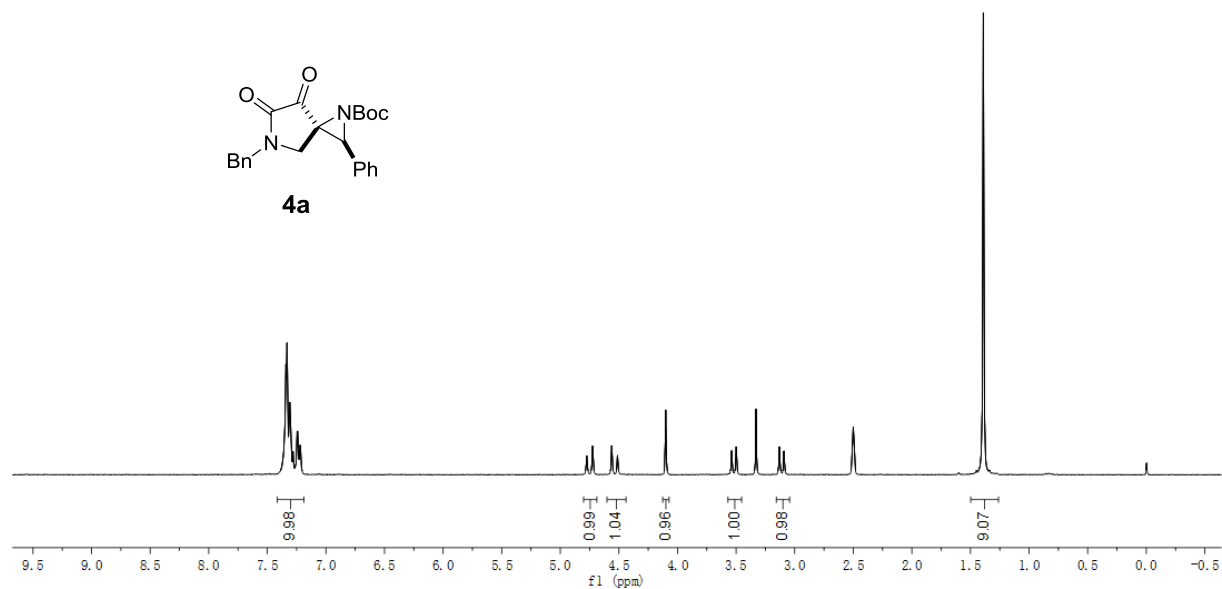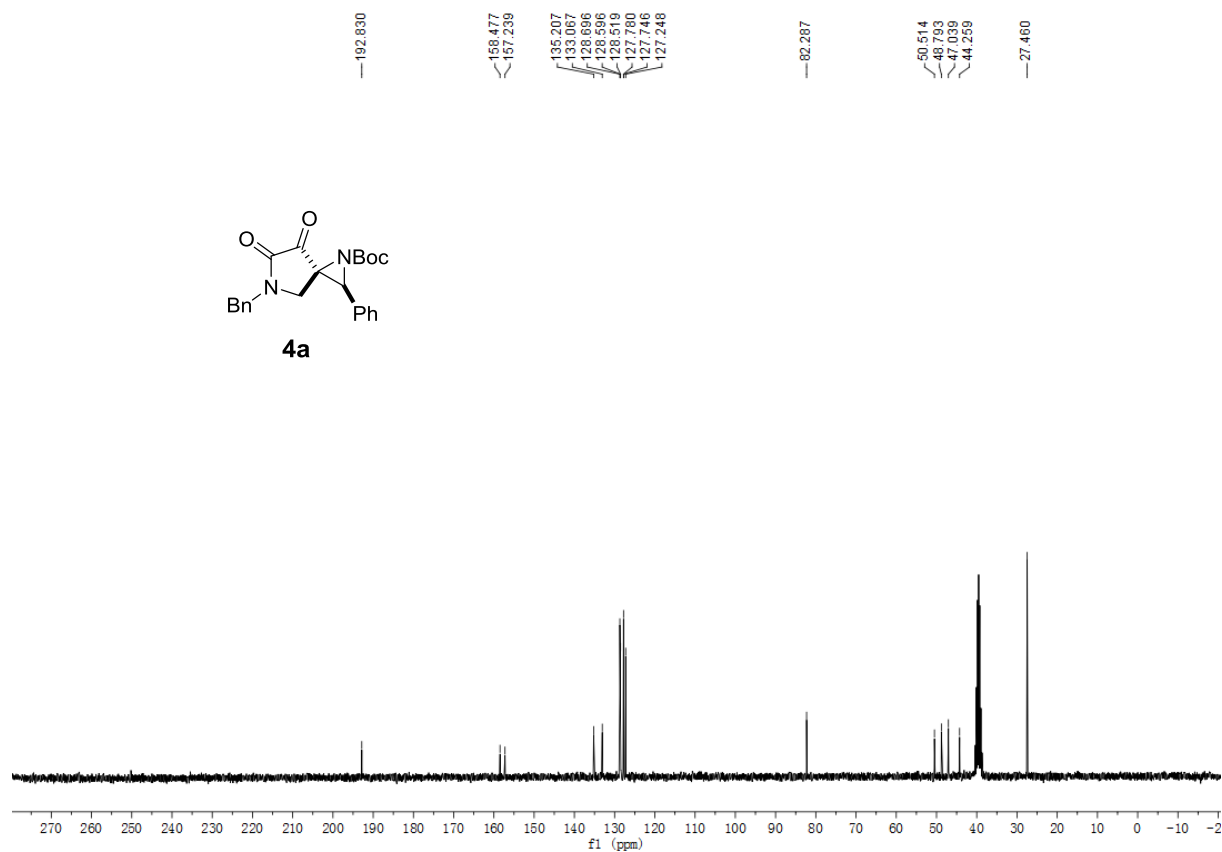

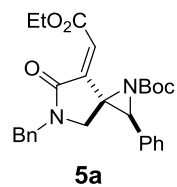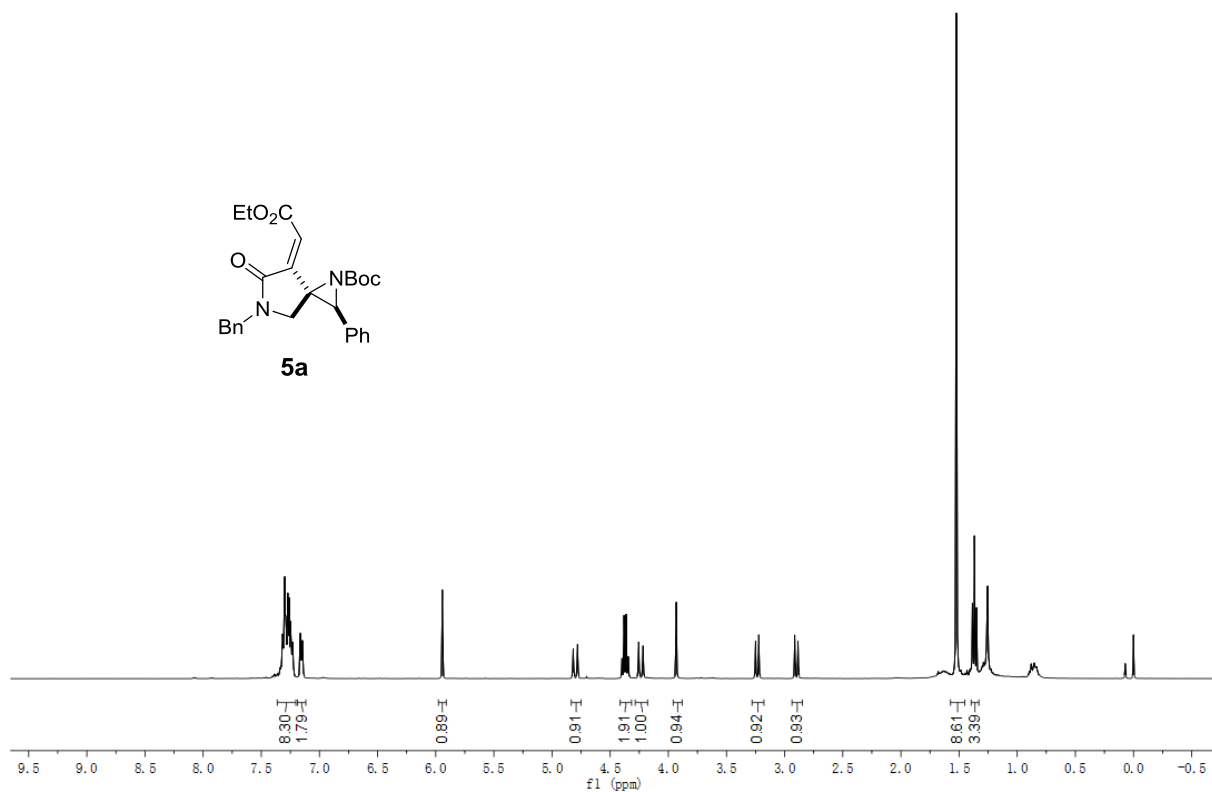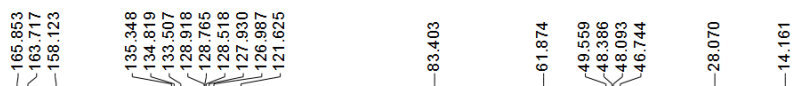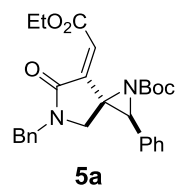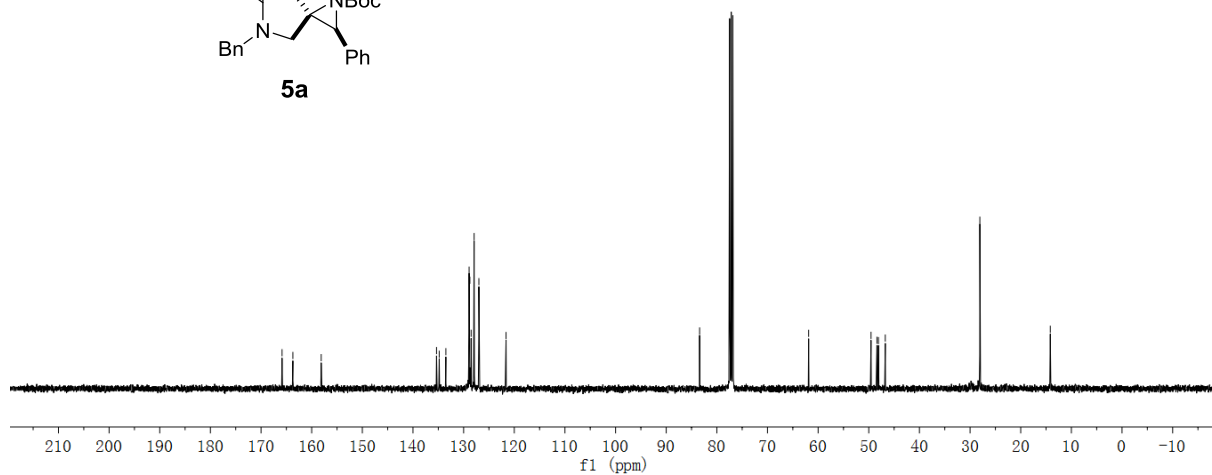

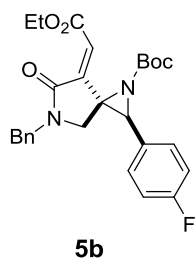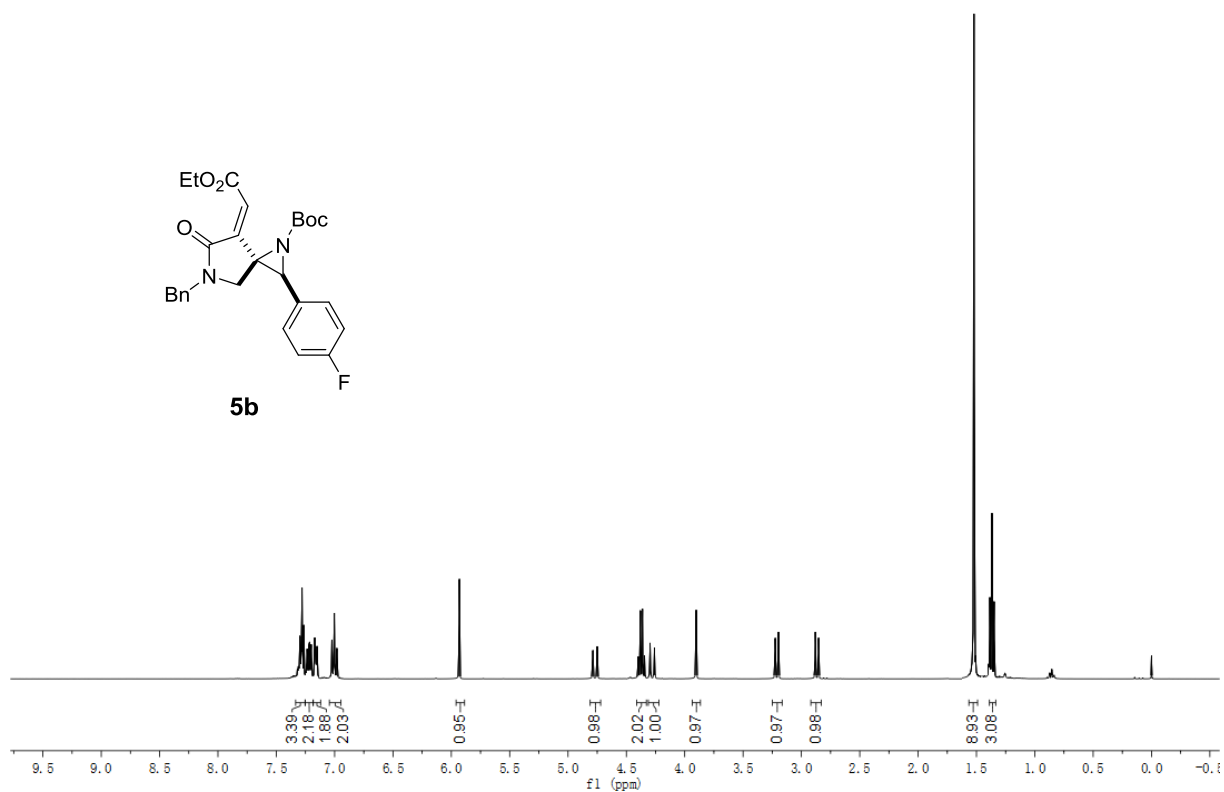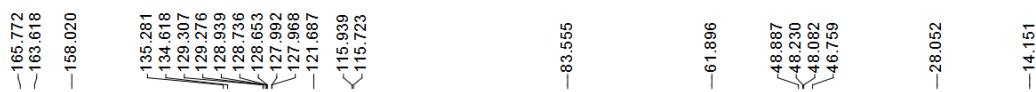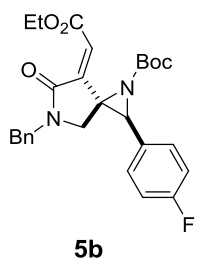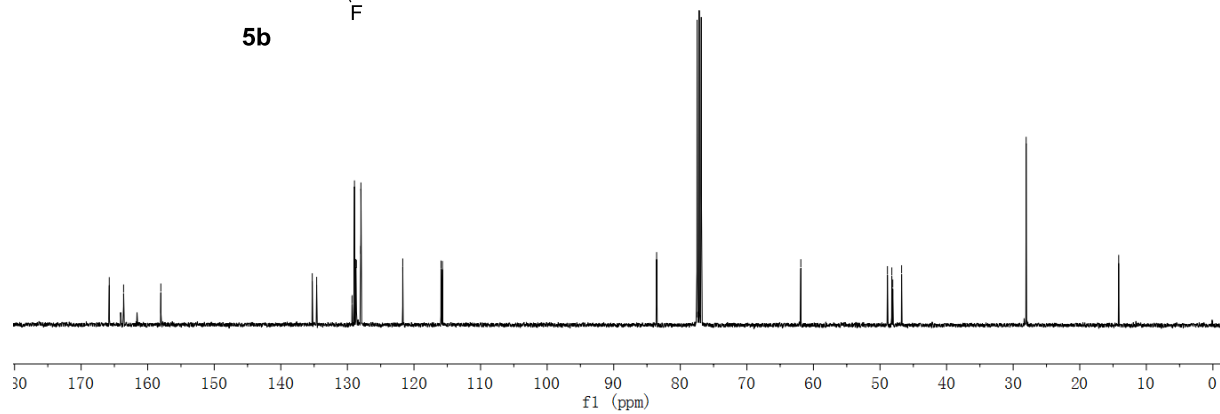

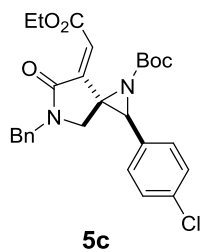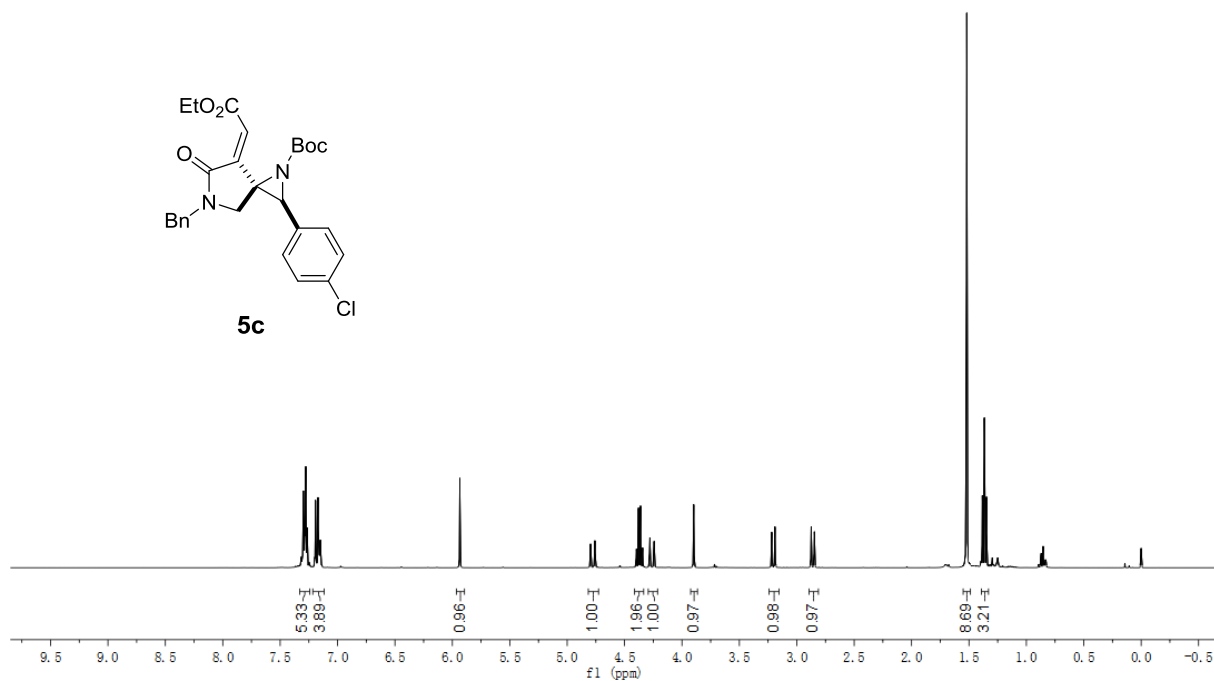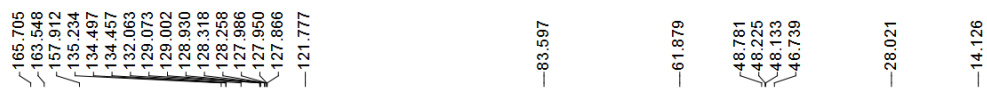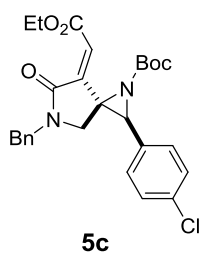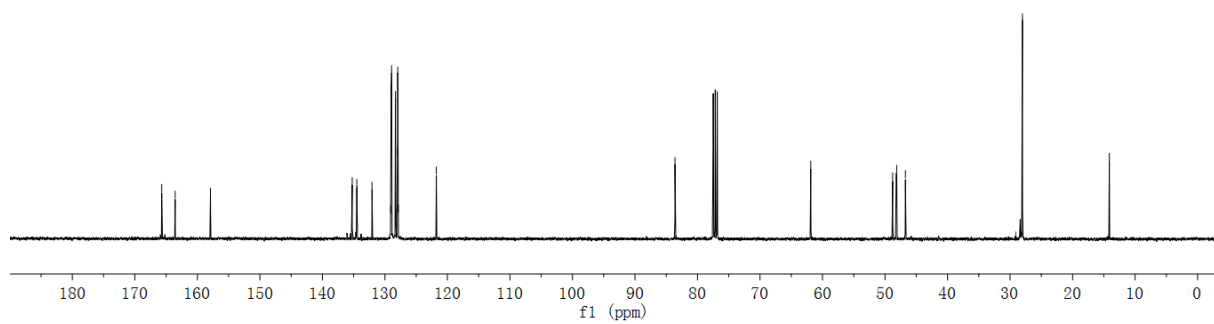



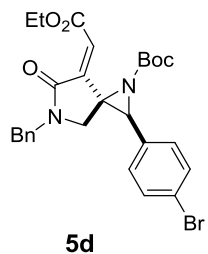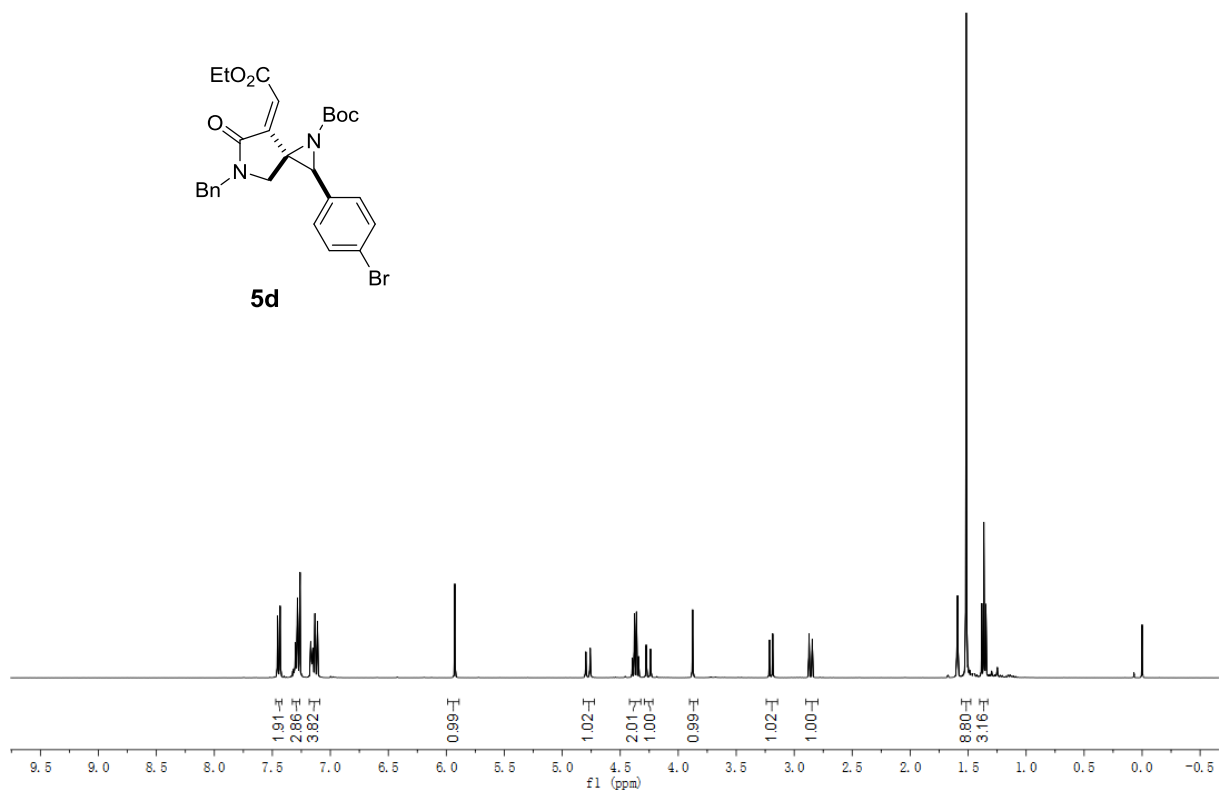

- Chemical shift values (ppm) for the <sup>13</sup>C NMR spectrum:
- 165.719
  - 163.569
  - 157.924
  - 135.275
  - 134.534
  - 132.638
  - 131.993
  - 128.977
  - 128.671
  - 128.034
  - 128.002
  - 122.664
  - 121.822
  - 83.663
  - 61.924
  - 48.907
  - 48.269
  - 48.139
  - 46.800
  - 28.065
  - 14.162

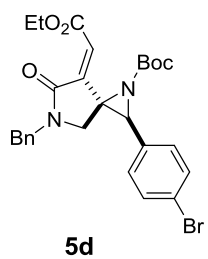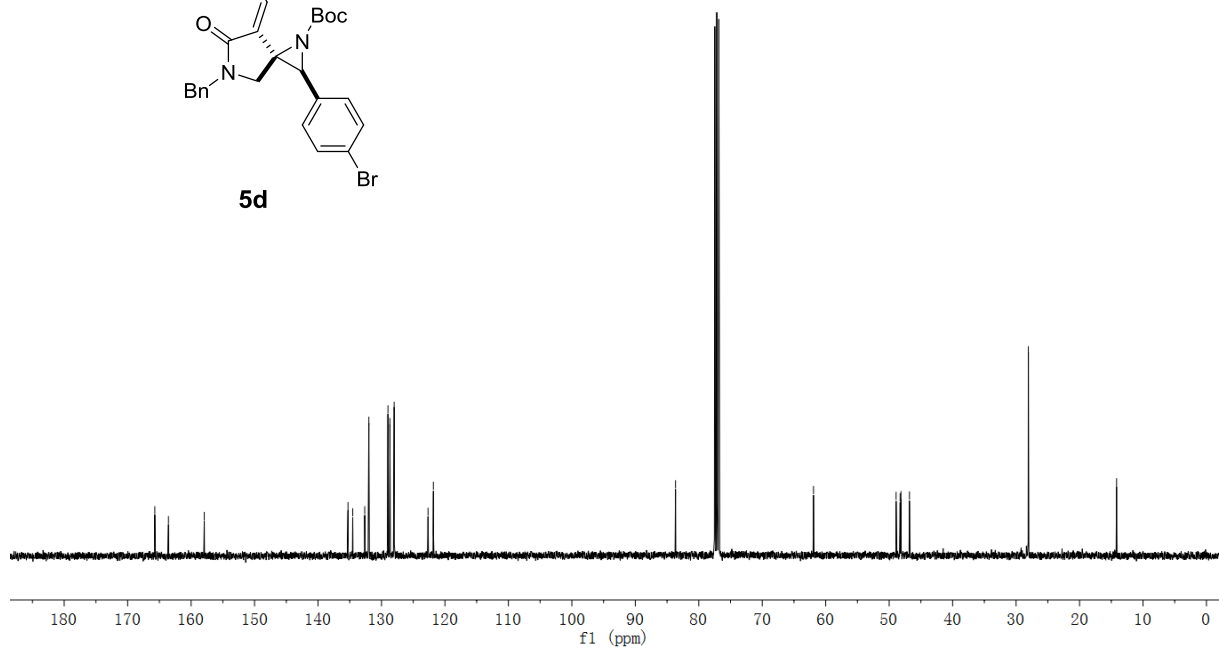

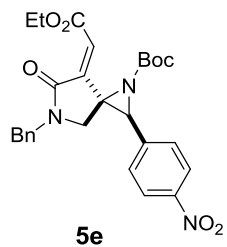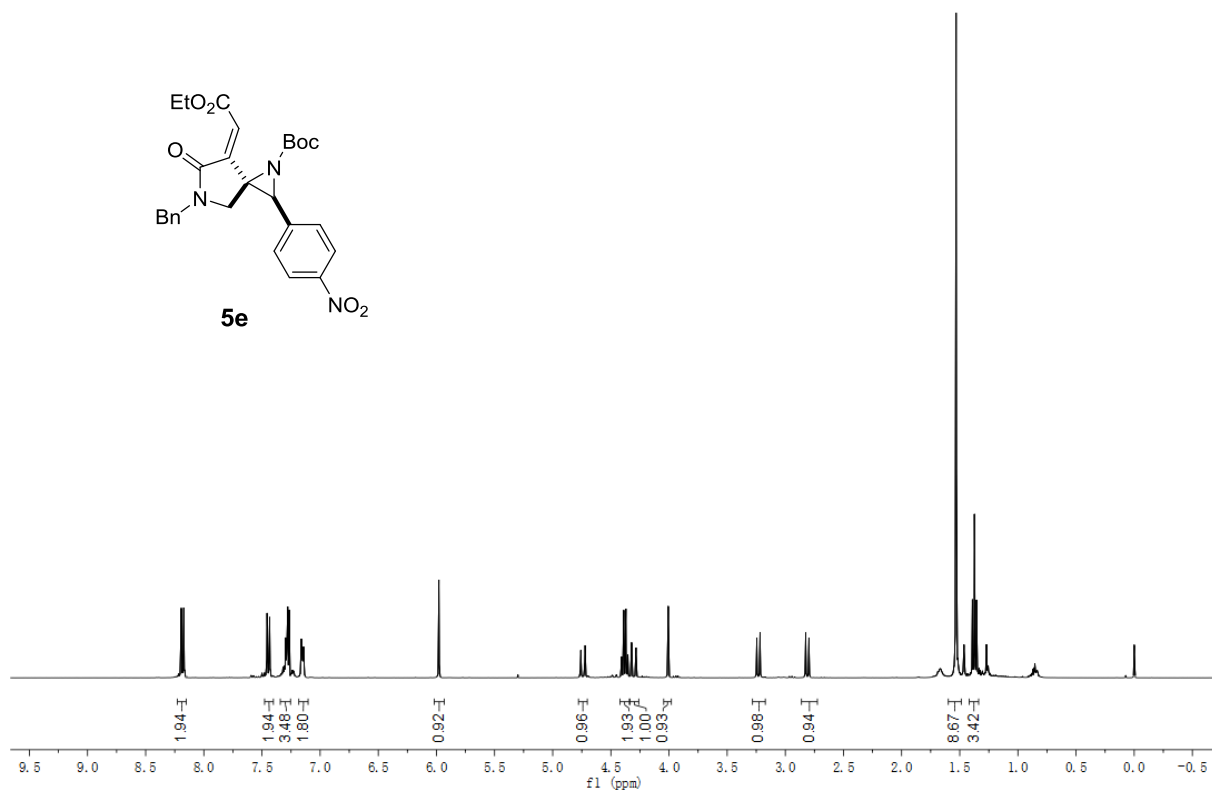

165.519  
163.325  
157.602  
146.089  
140.831  
135.073  
134.038  
129.063  
128.998  
128.120  
128.007  
124.070  
122.307

-84.116

-62.022

48.639  
48.464  
48.154  
46.796

-28.024

-14.140

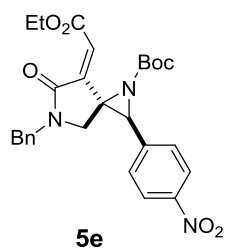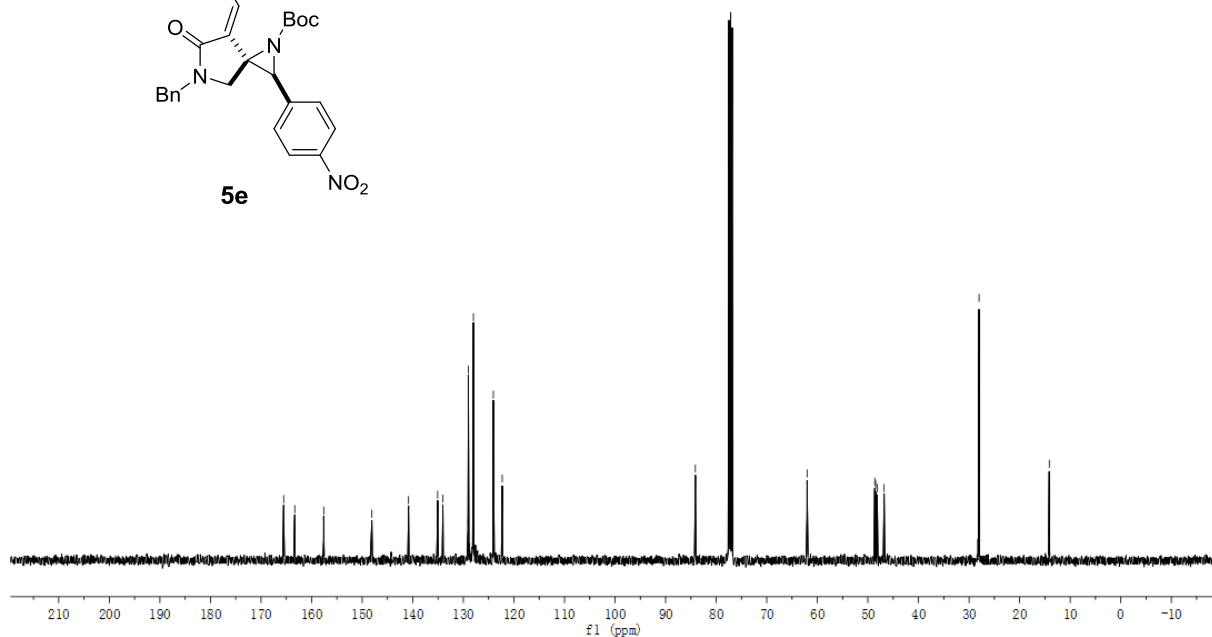

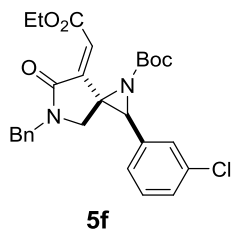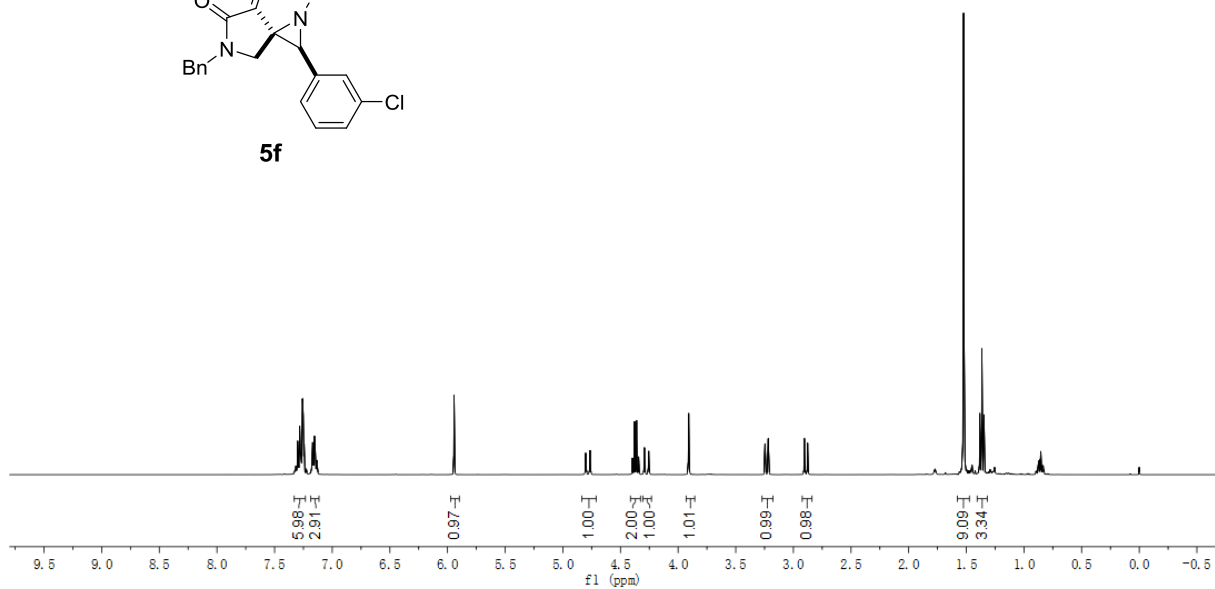

165.613  
 163.490  
 157.789  
 135.604  
 135.203  
 134.847  
 134.380  
 130.056  
 128.890  
 128.725  
 127.934  
 127.847  
 126.868  
 125.299  
 121.845  
 83.596  
 61.827  
 48.632  
 48.230  
 48.171  
 46.667  
 27.979  
 14.089

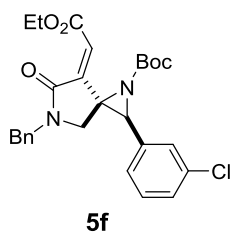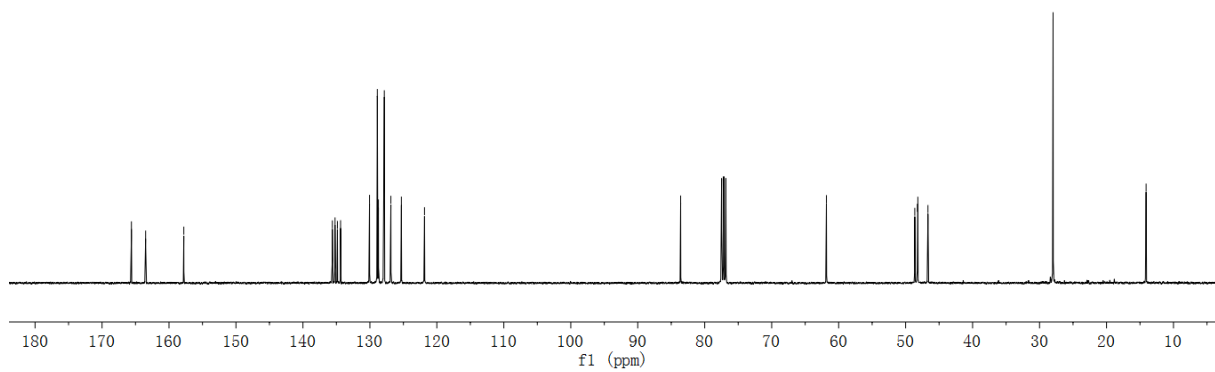

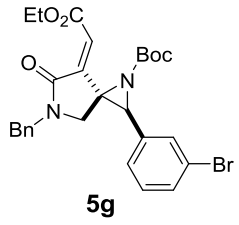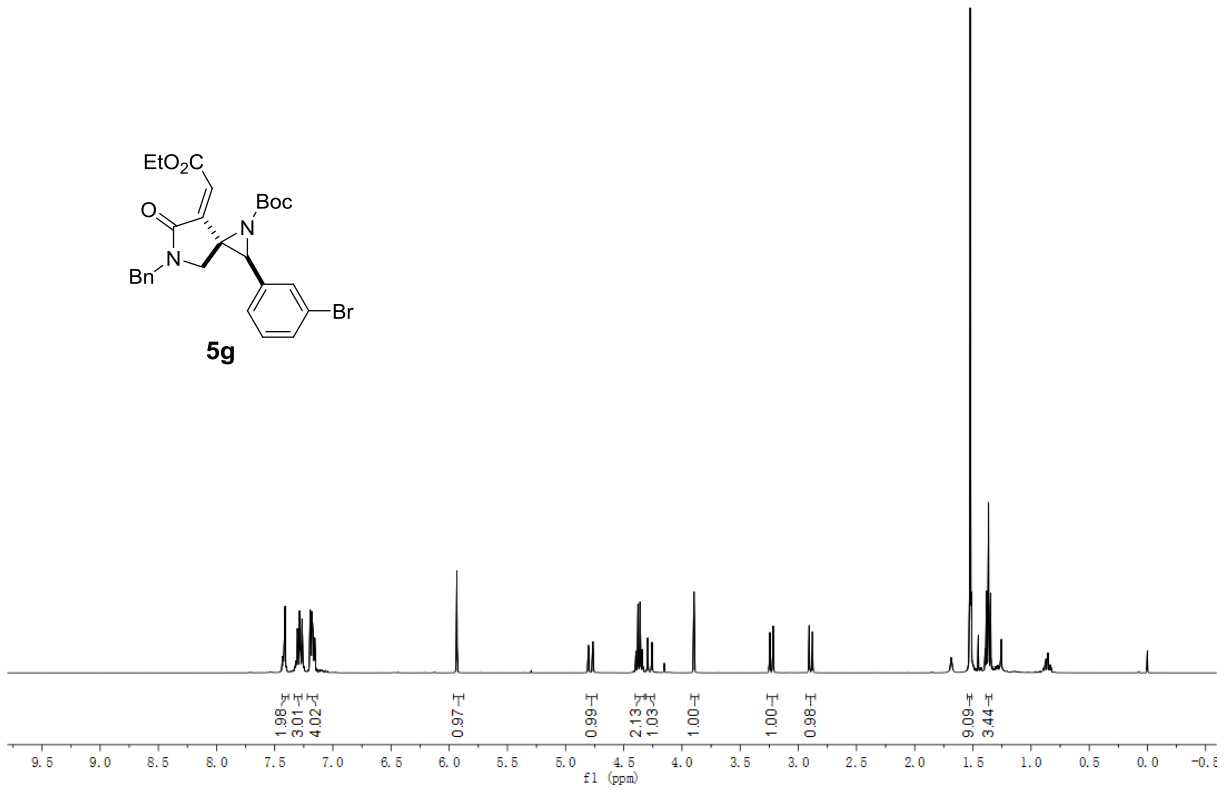

- ~165.654
- ~163.531
- ~157.827
- 135.876
- 135.239
- 134.419
- 131.716
- 130.351
- 129.822
- 128.945
- 127.990
- 127.901
- 125.811
- 123.015
- 121.880
- 83.684
- 61.891
- 48.621
- 48.268
- 48.240
- 46.730
- 28.029
- 14.134

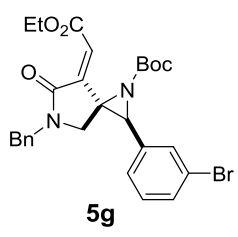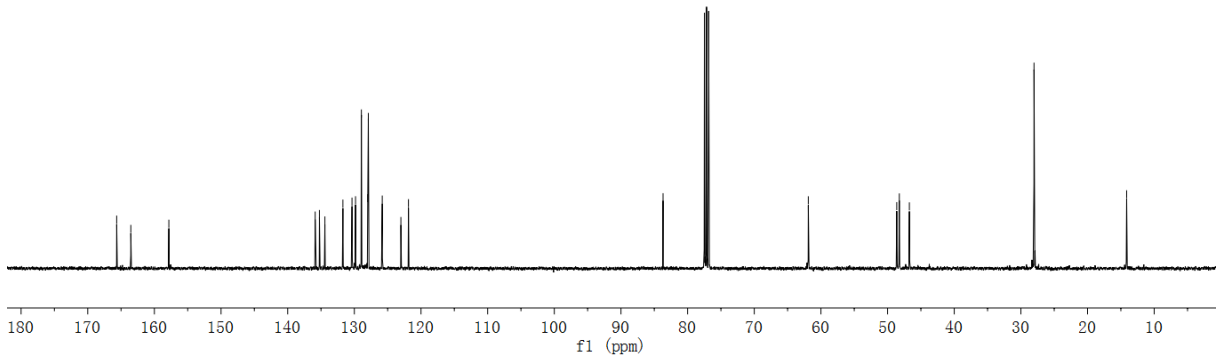

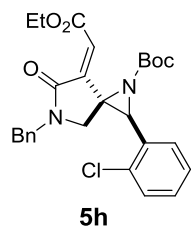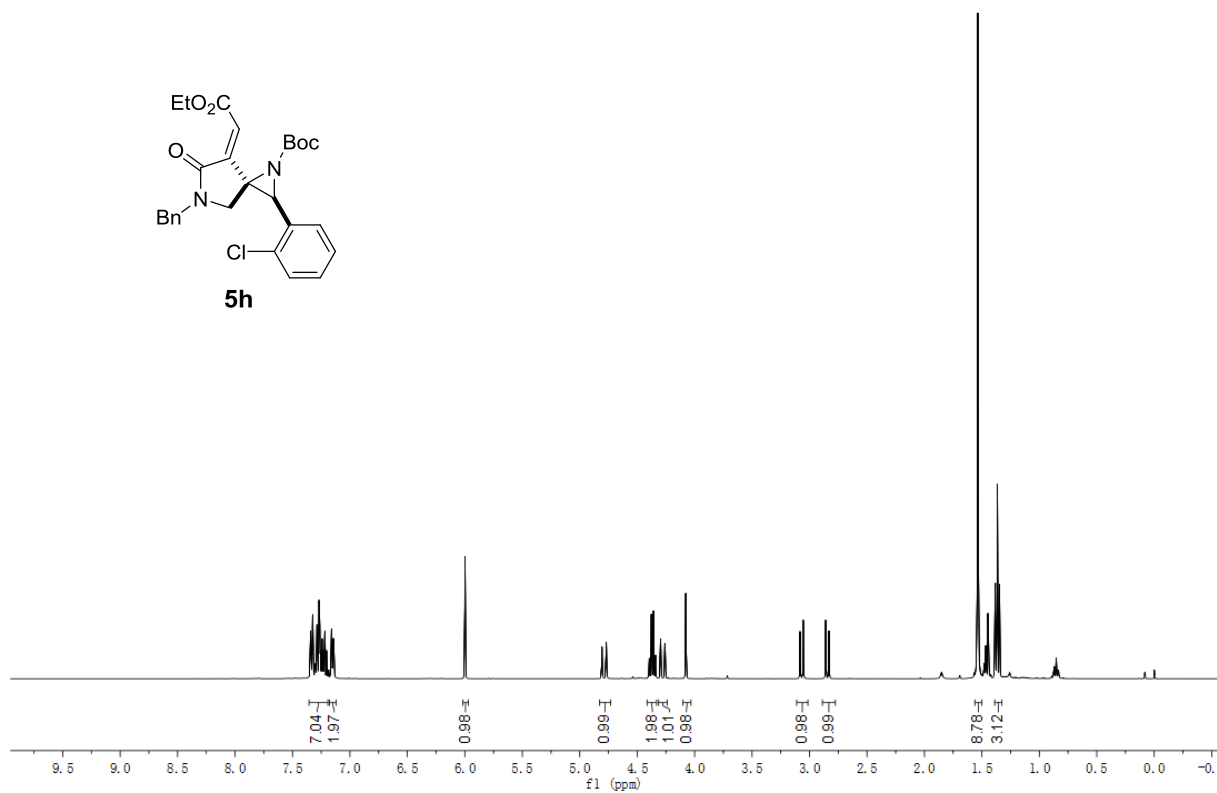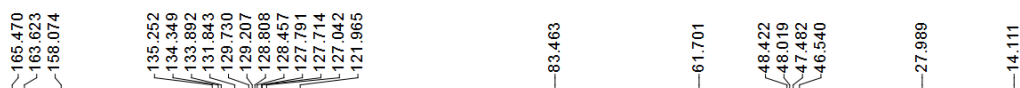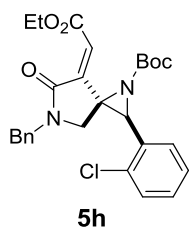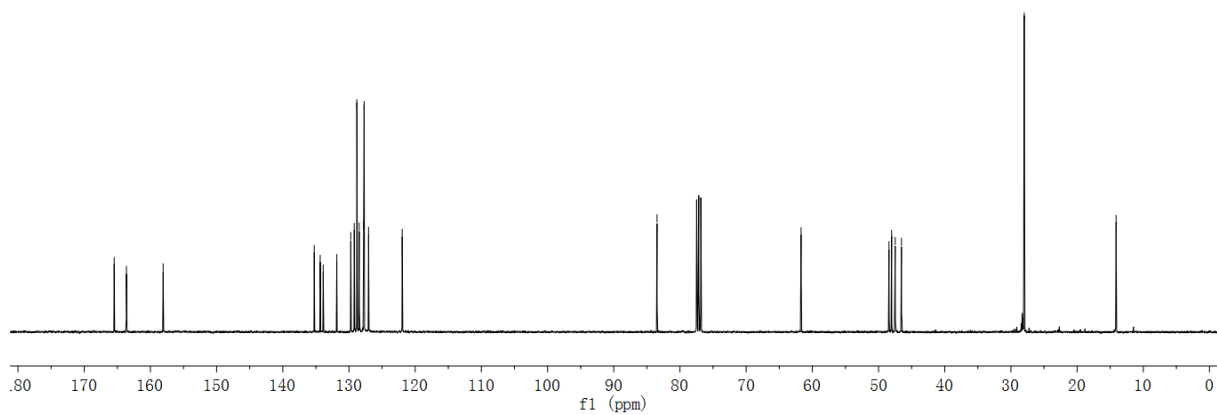

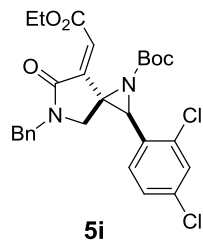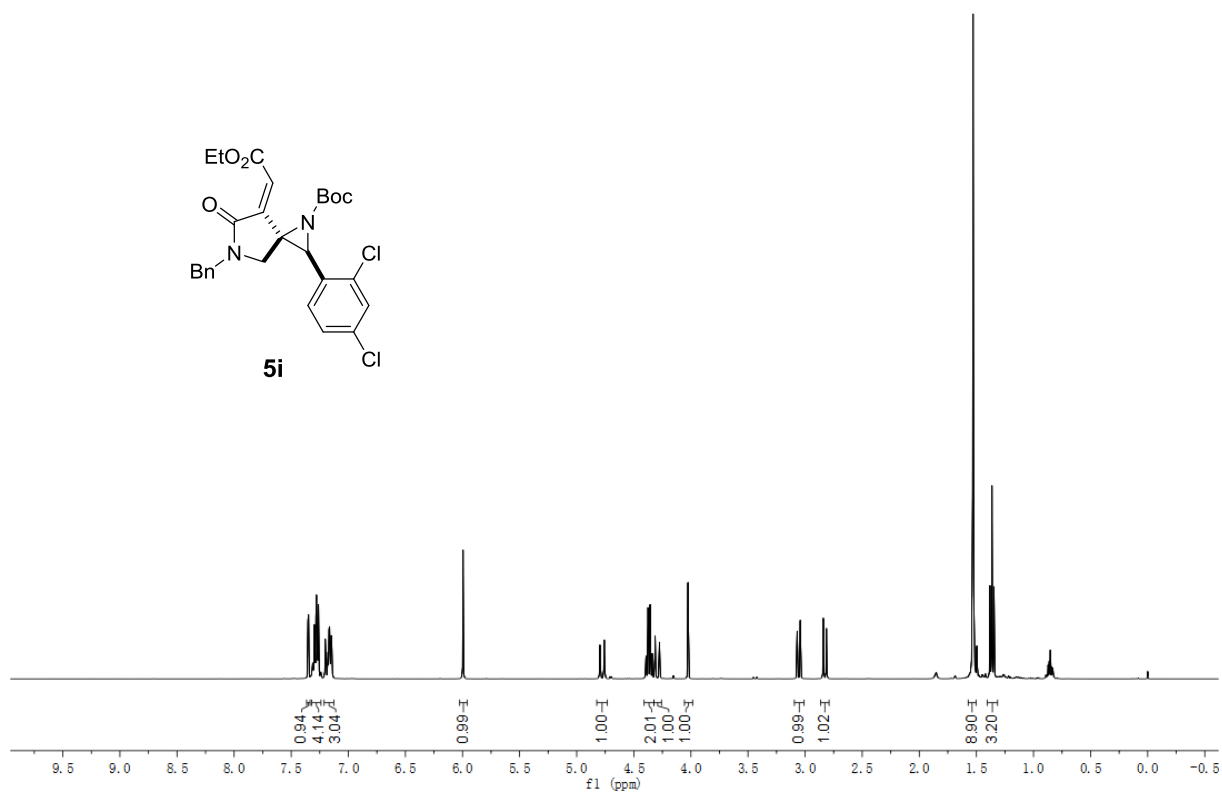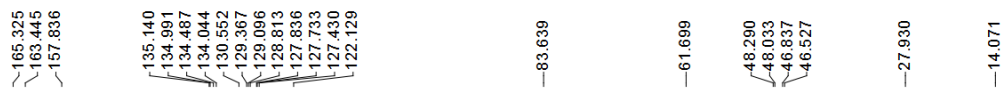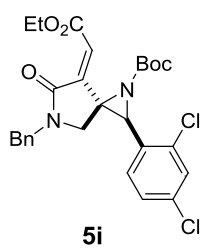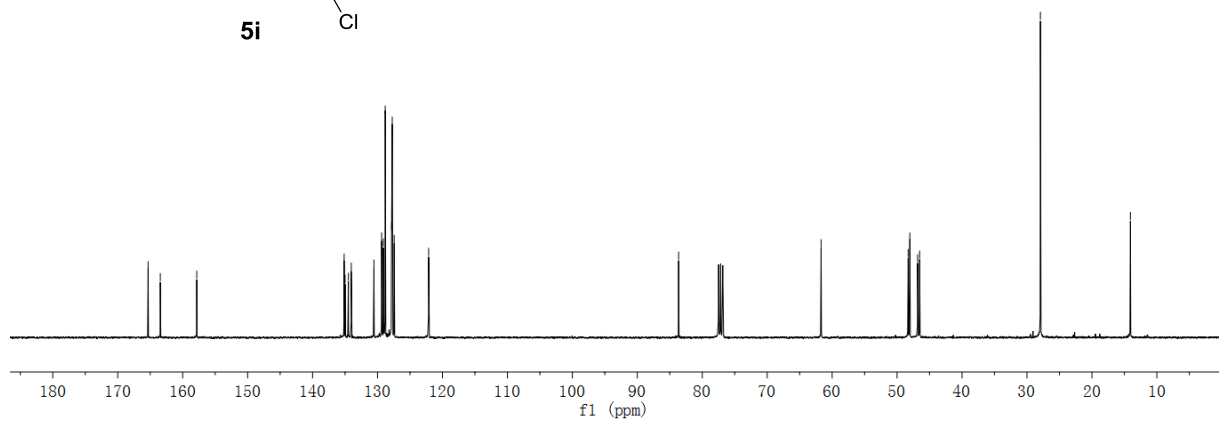

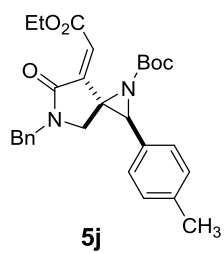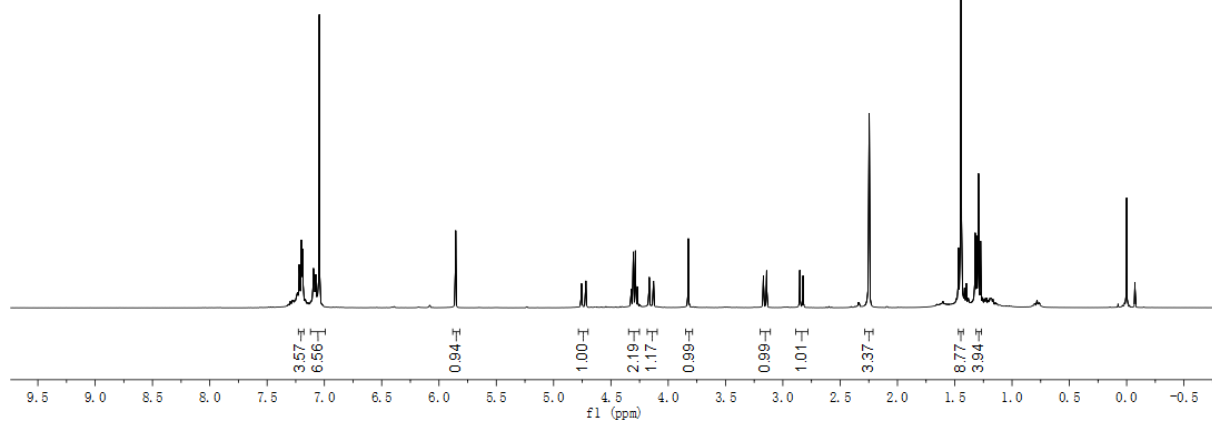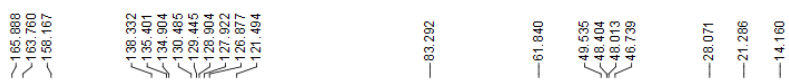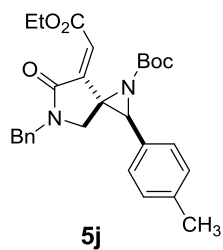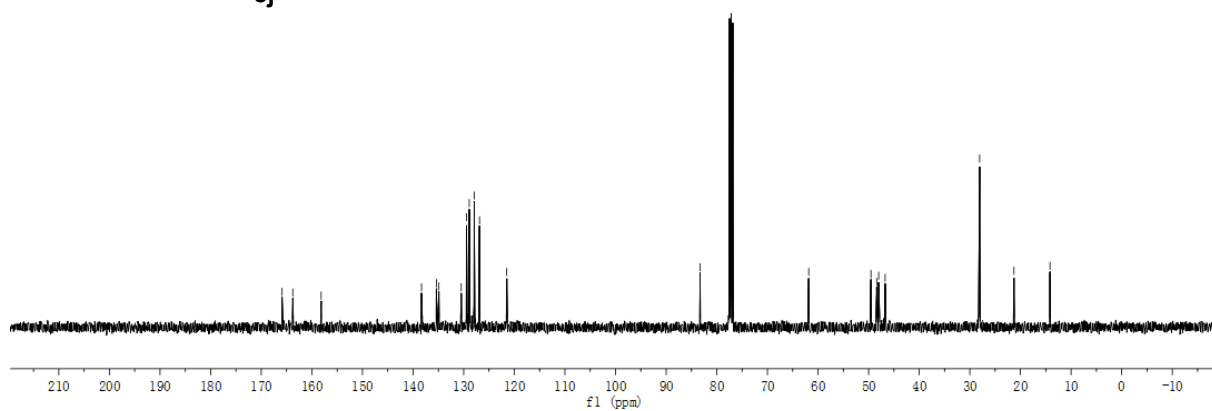

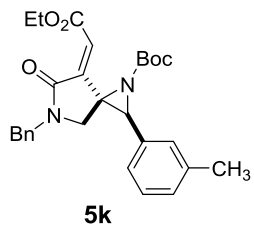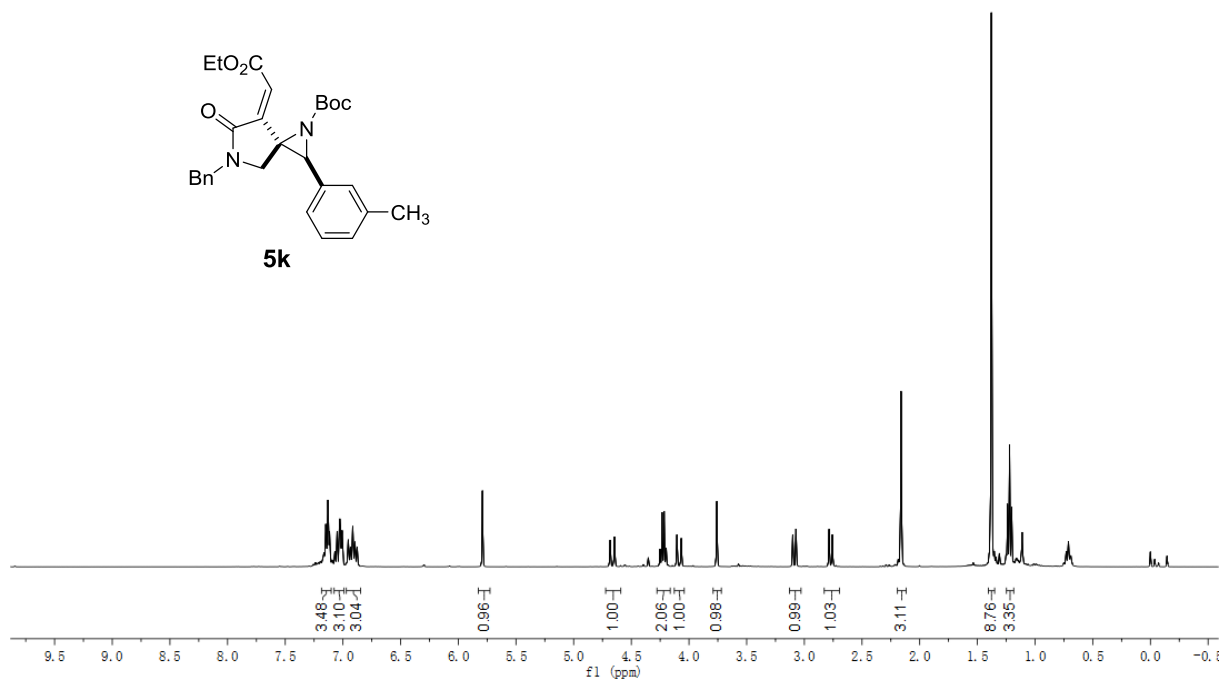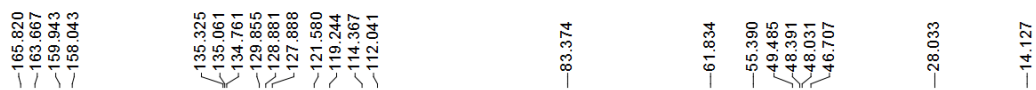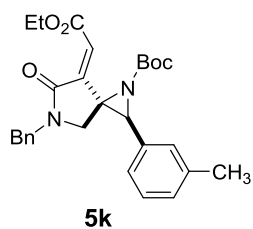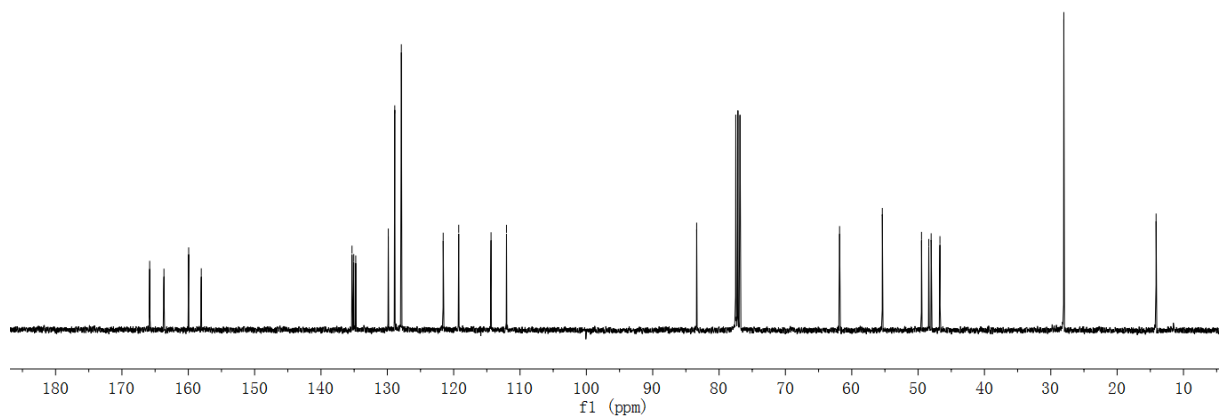



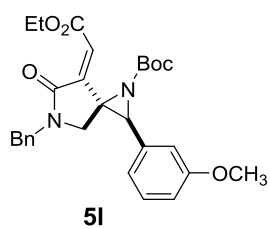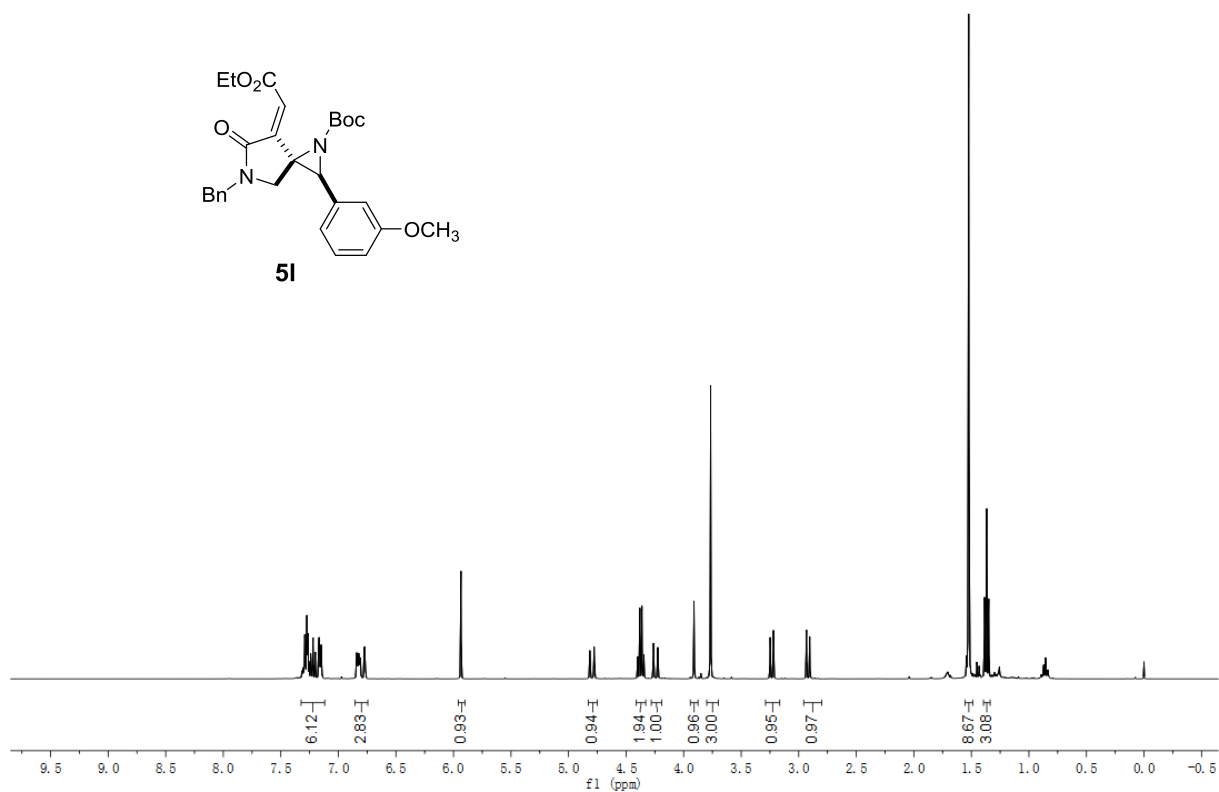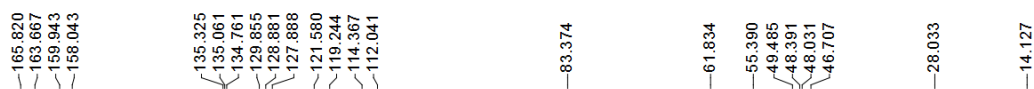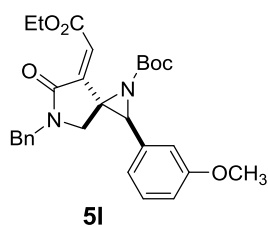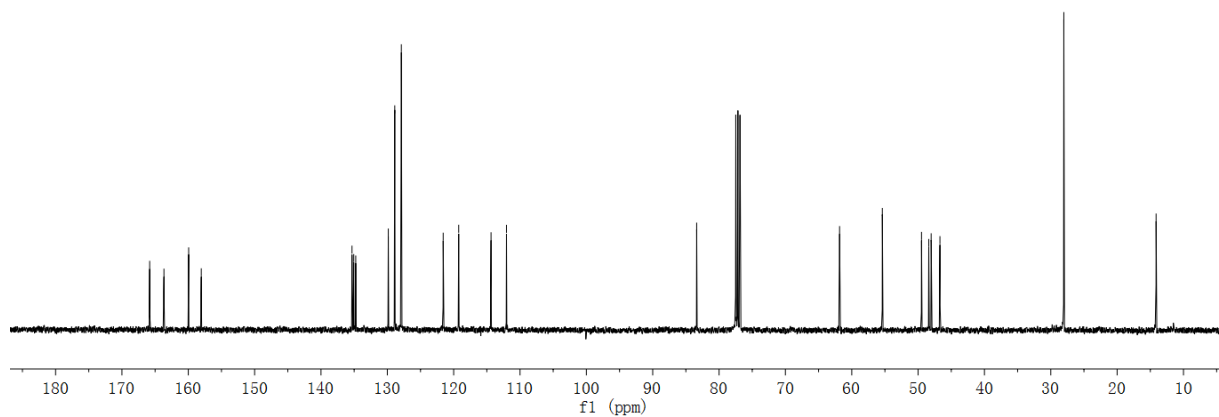

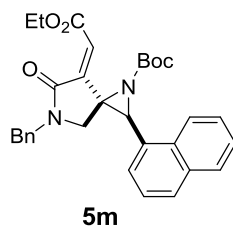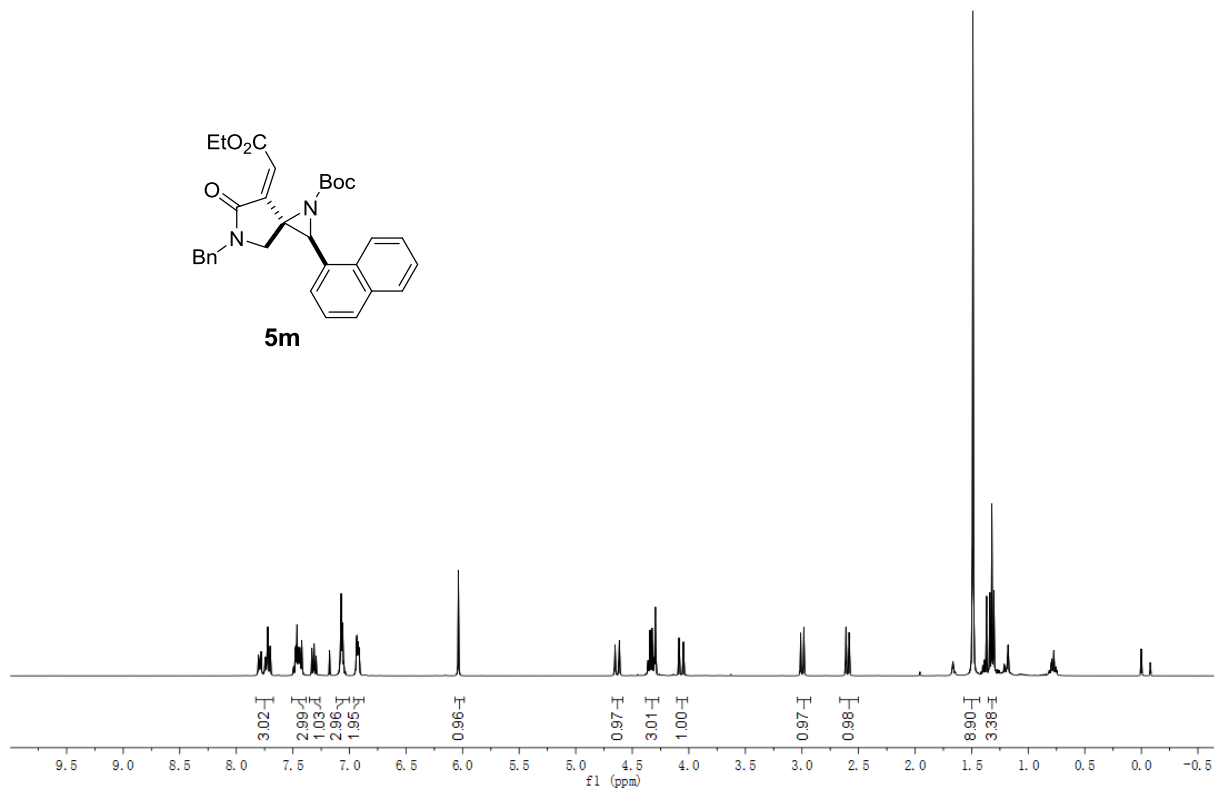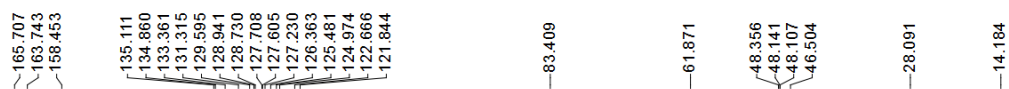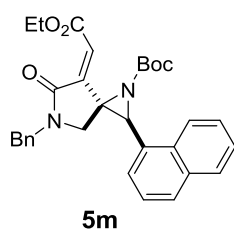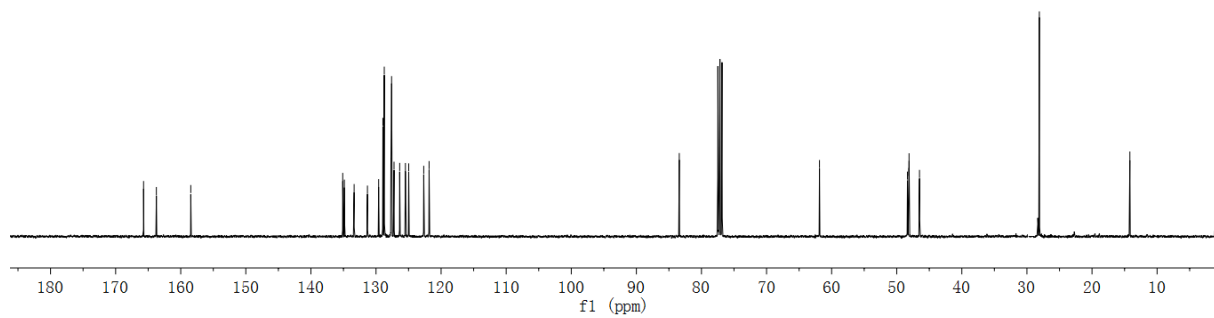

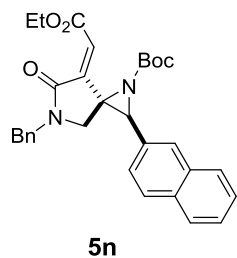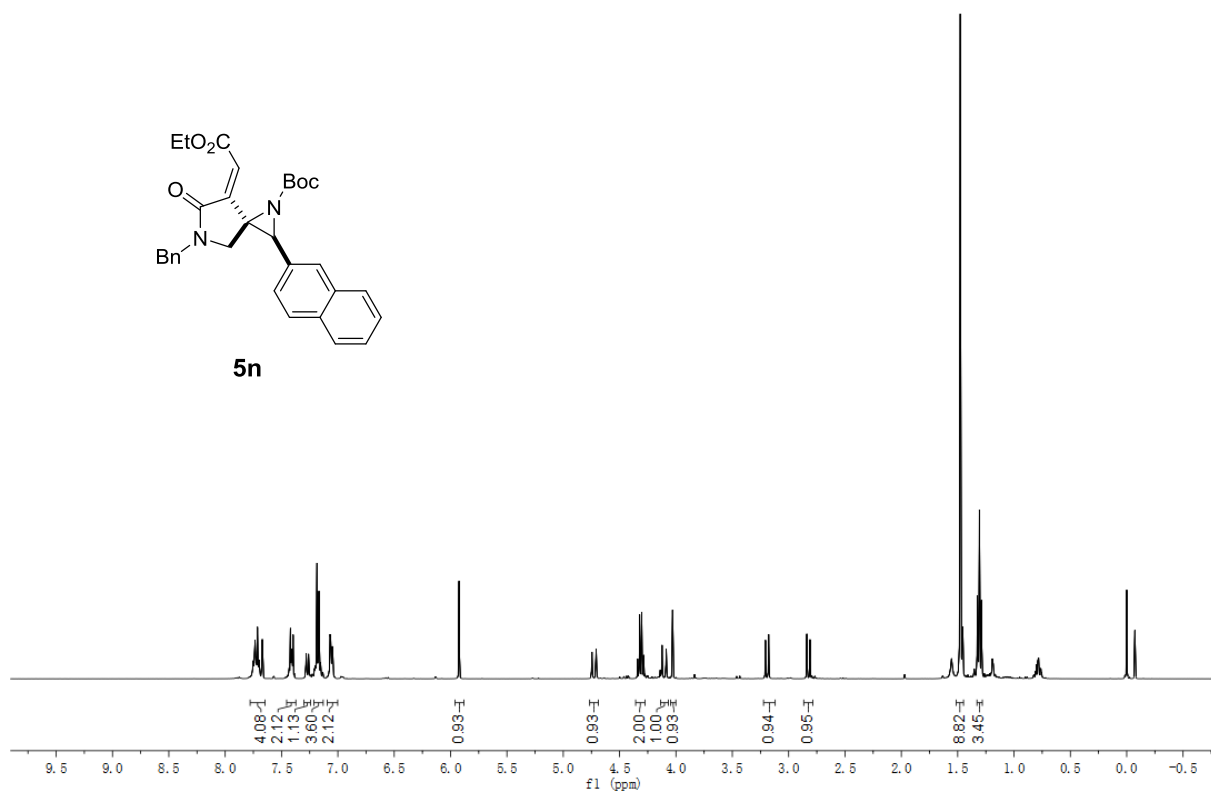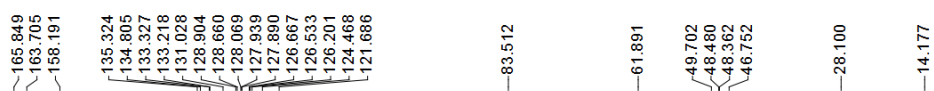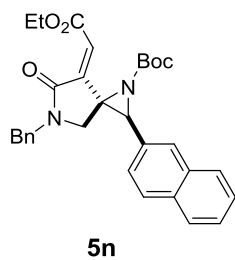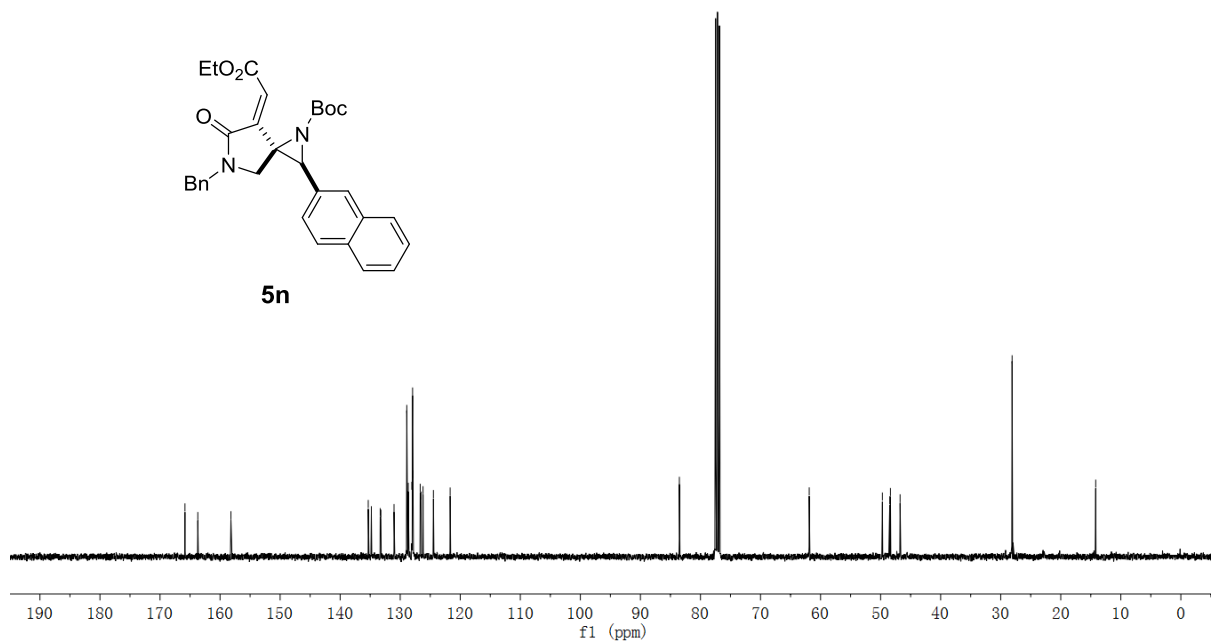

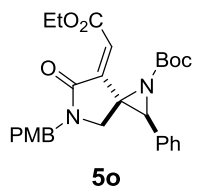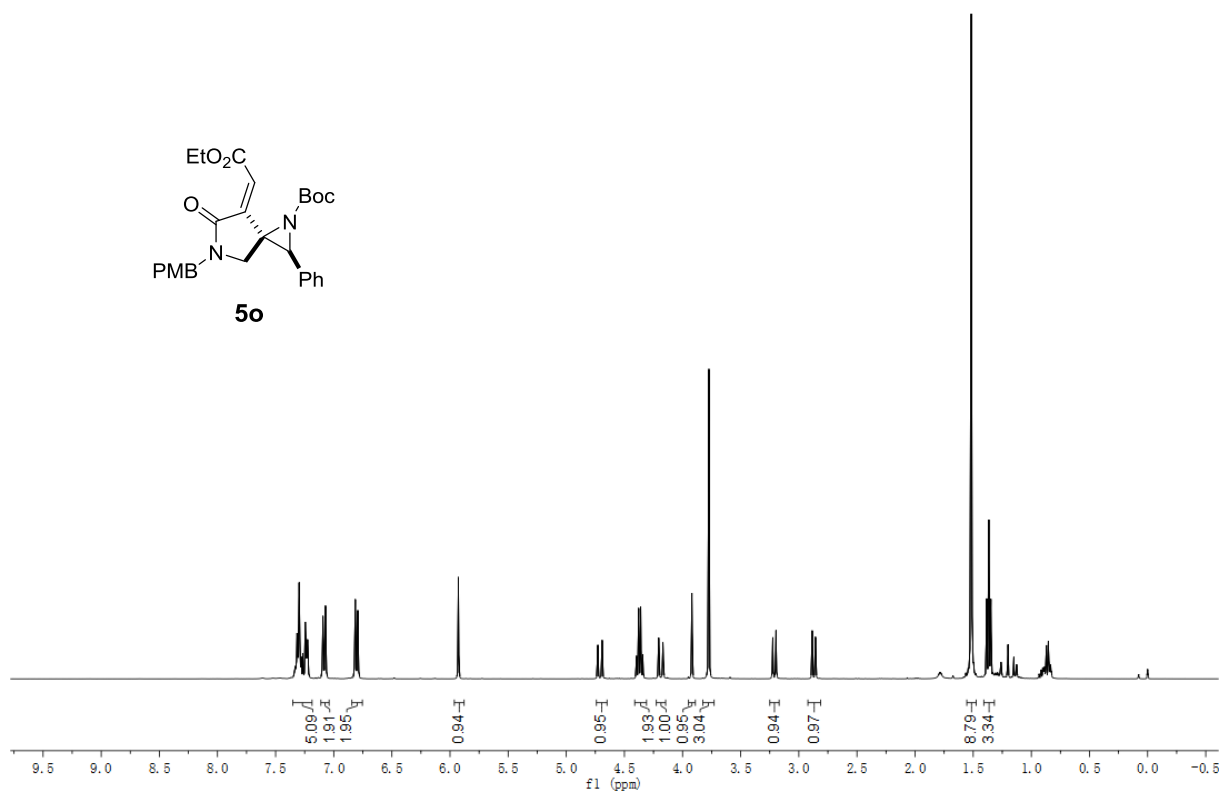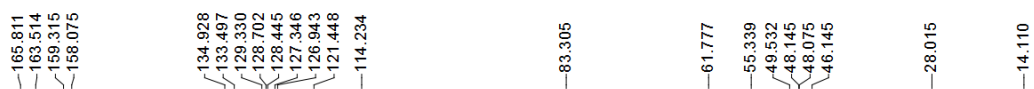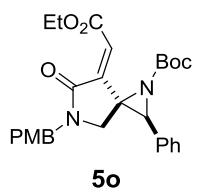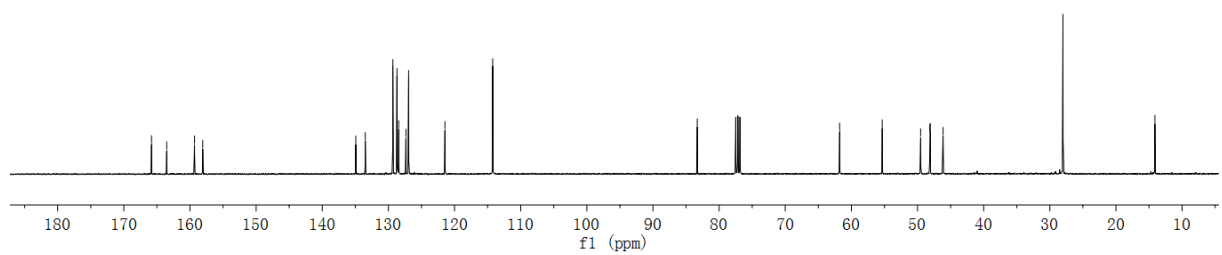

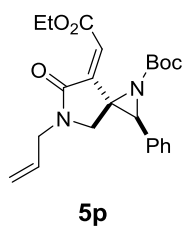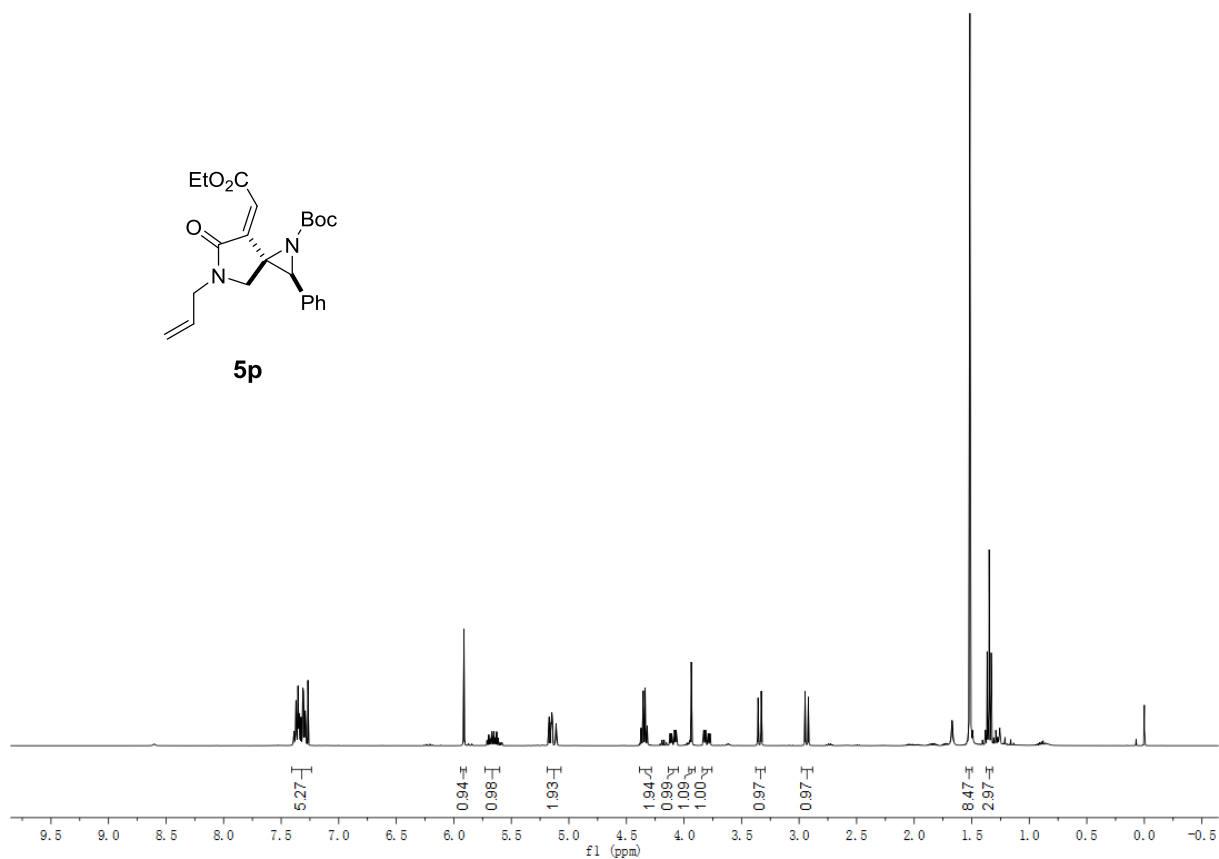

- ~165.865
- ~163.415
- ~158.166
- ~134.755
- ~133.589
- ~131.181
- ~128.806
- ~128.561
- ~127.014
- ~121.402
- ~118.687
- 83.486
- 61.836
- ~49.892
- ~48.429
- ~45.105
- ~45.405
- 28.070
- 14.131

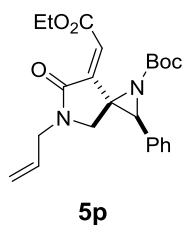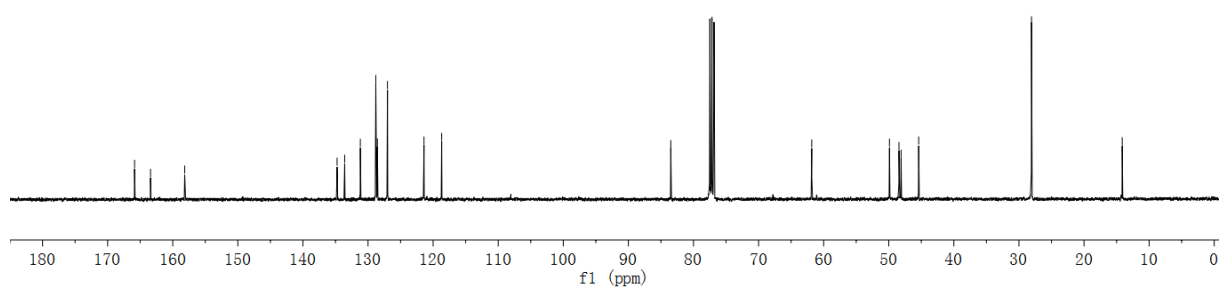

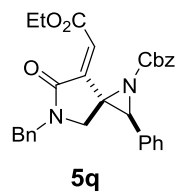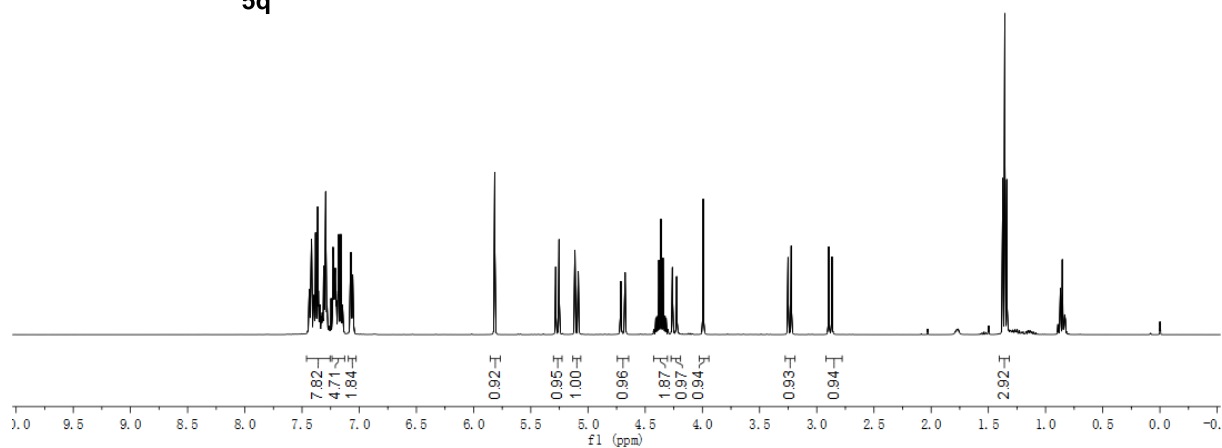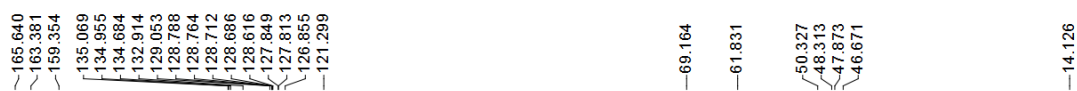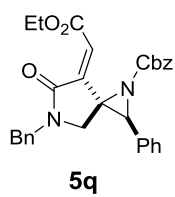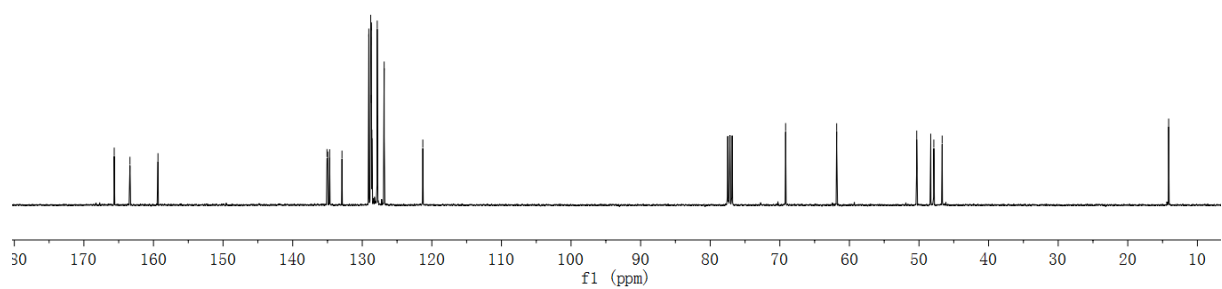

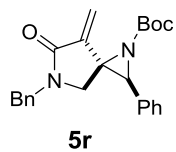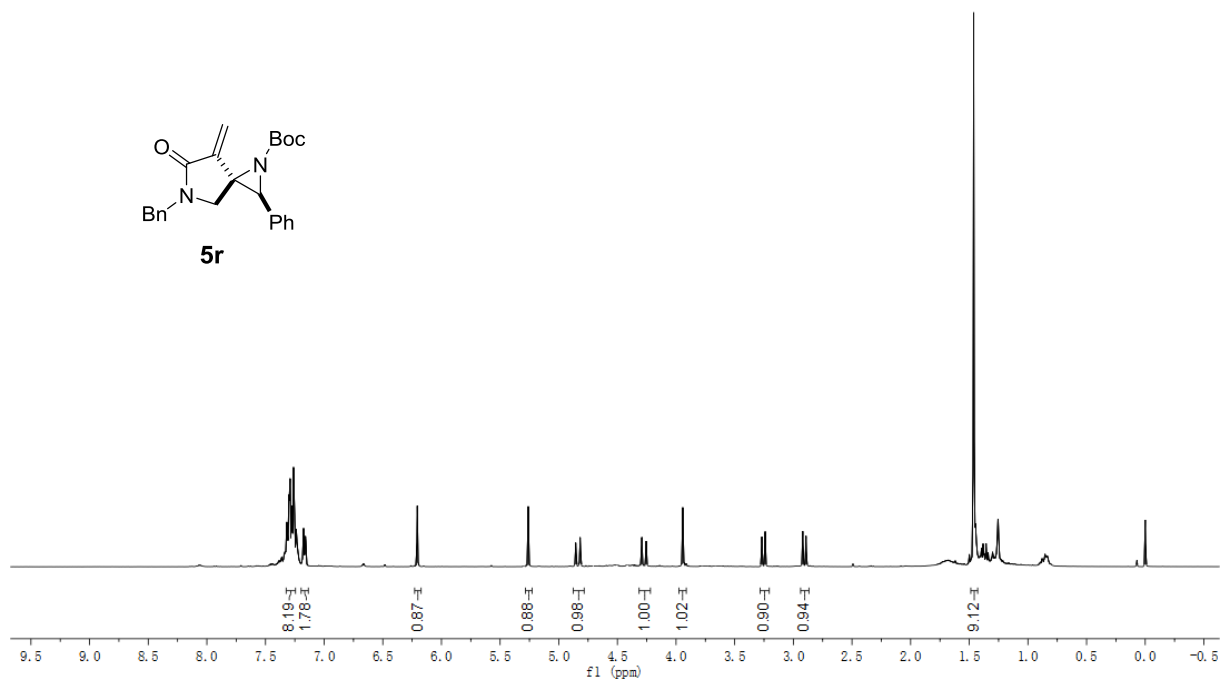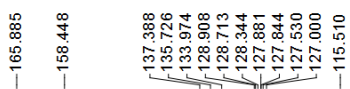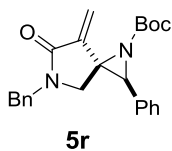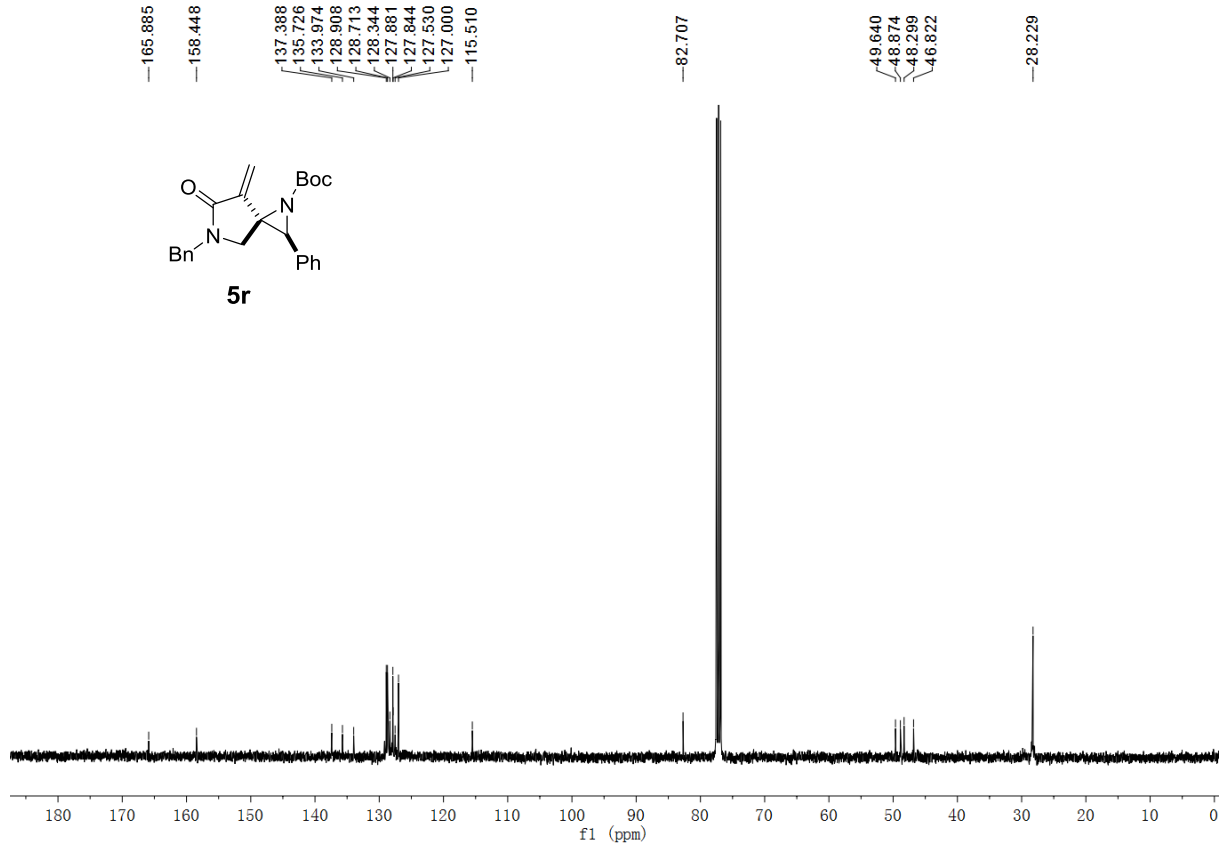

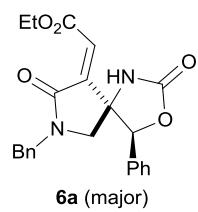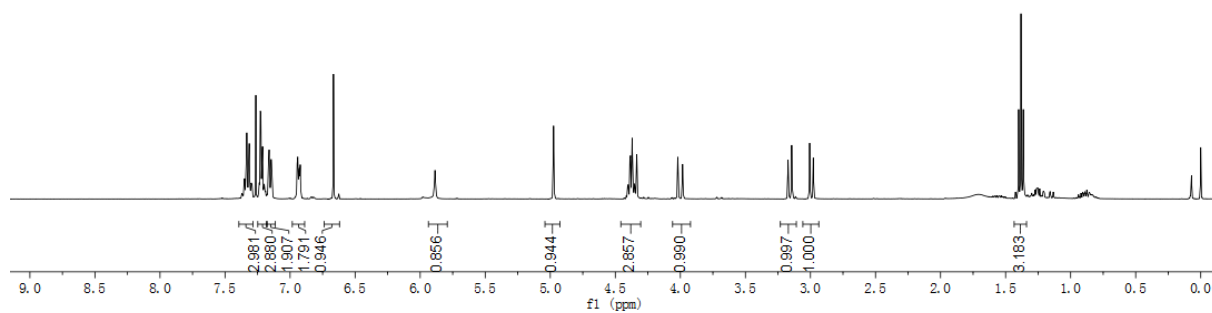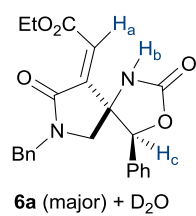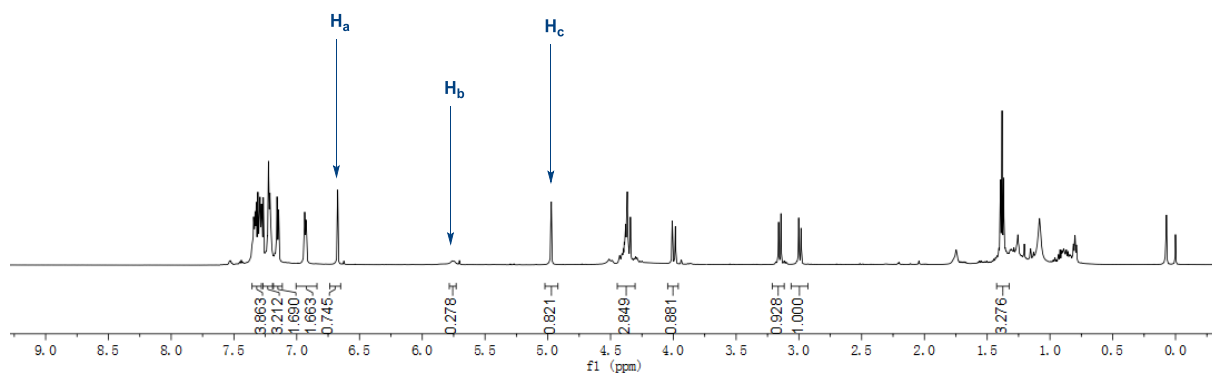



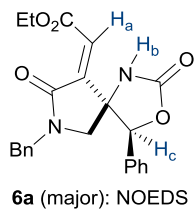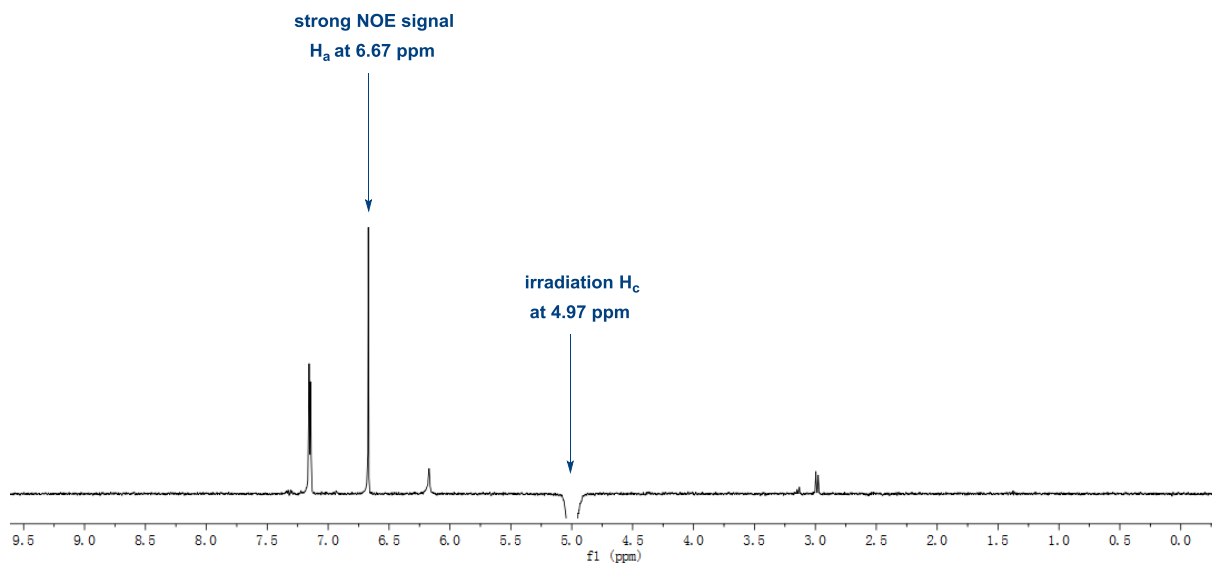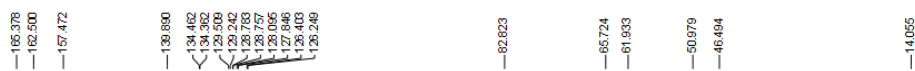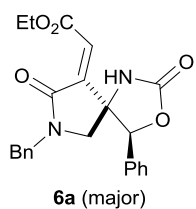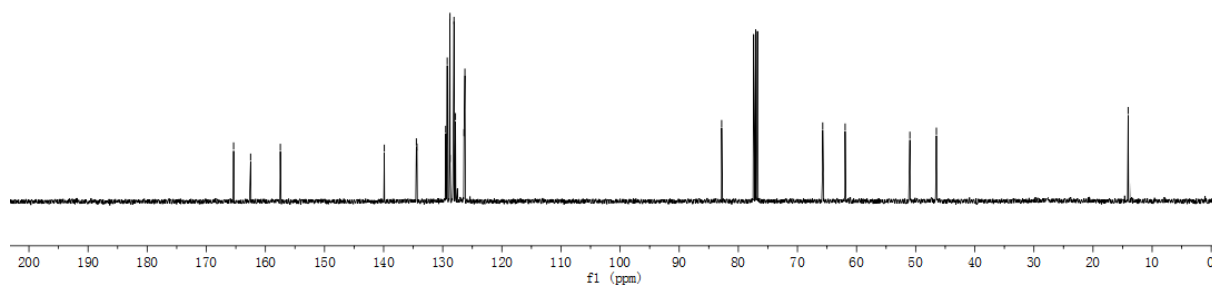

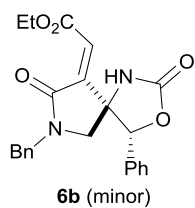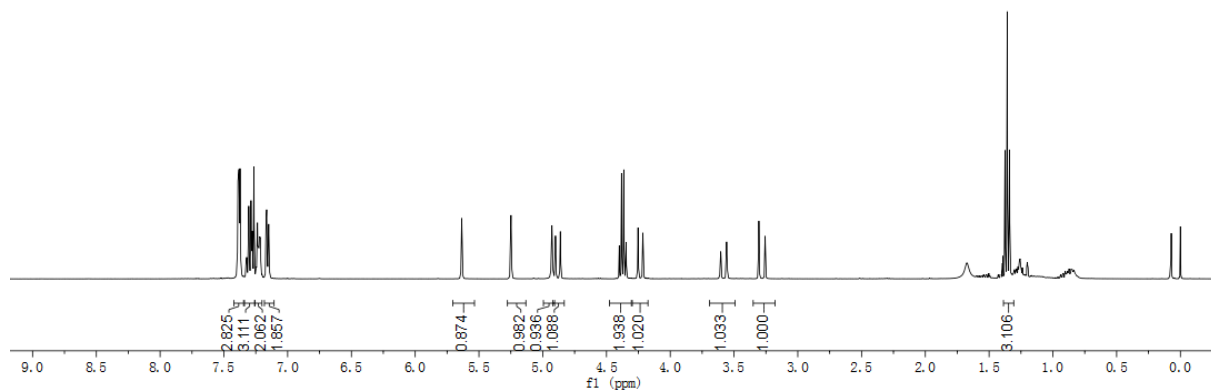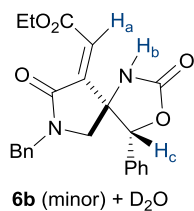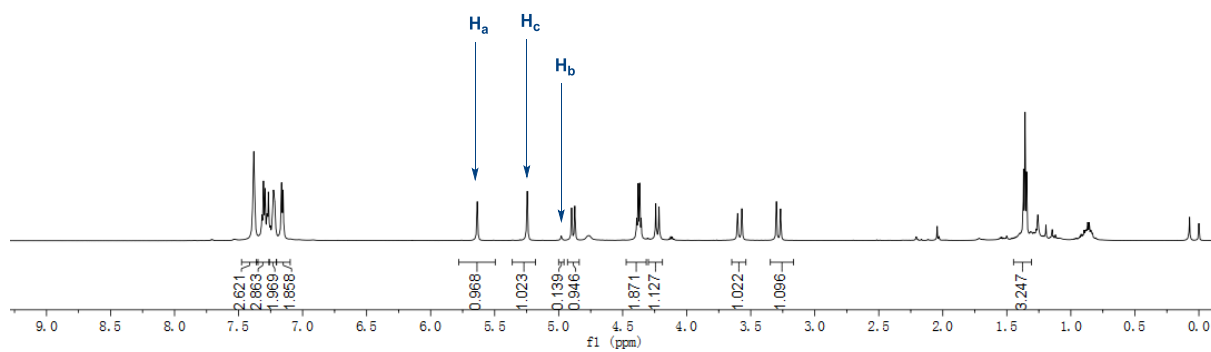

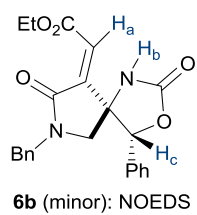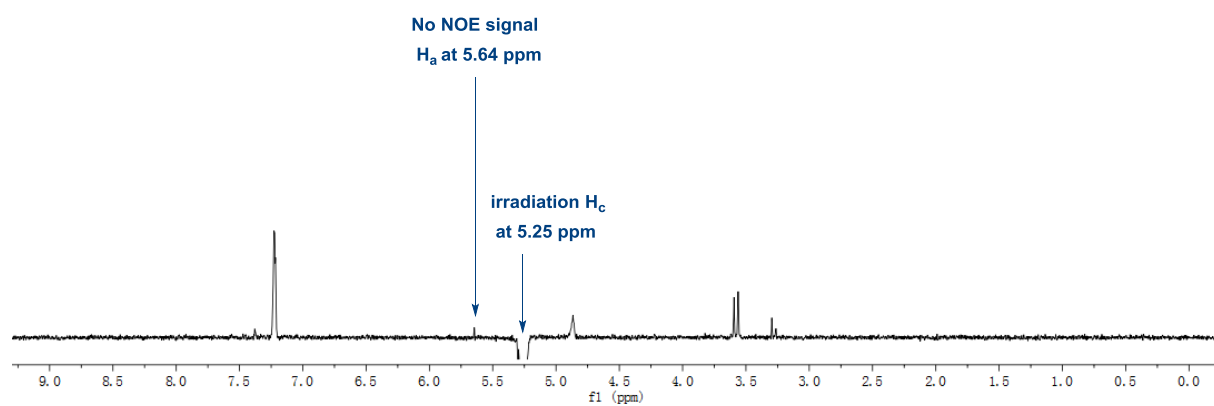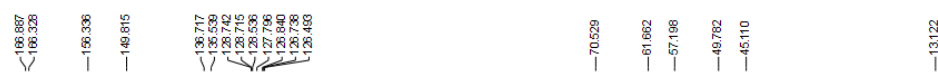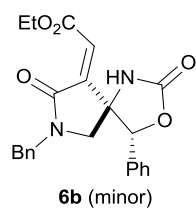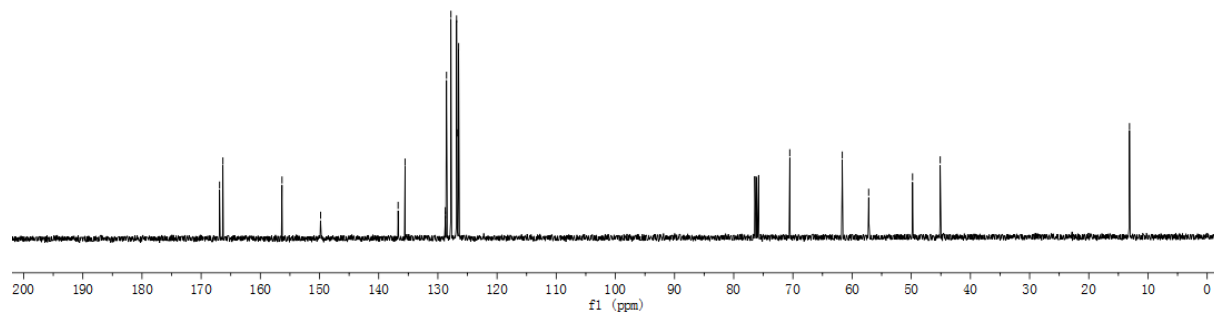

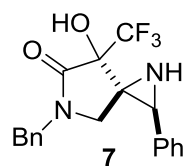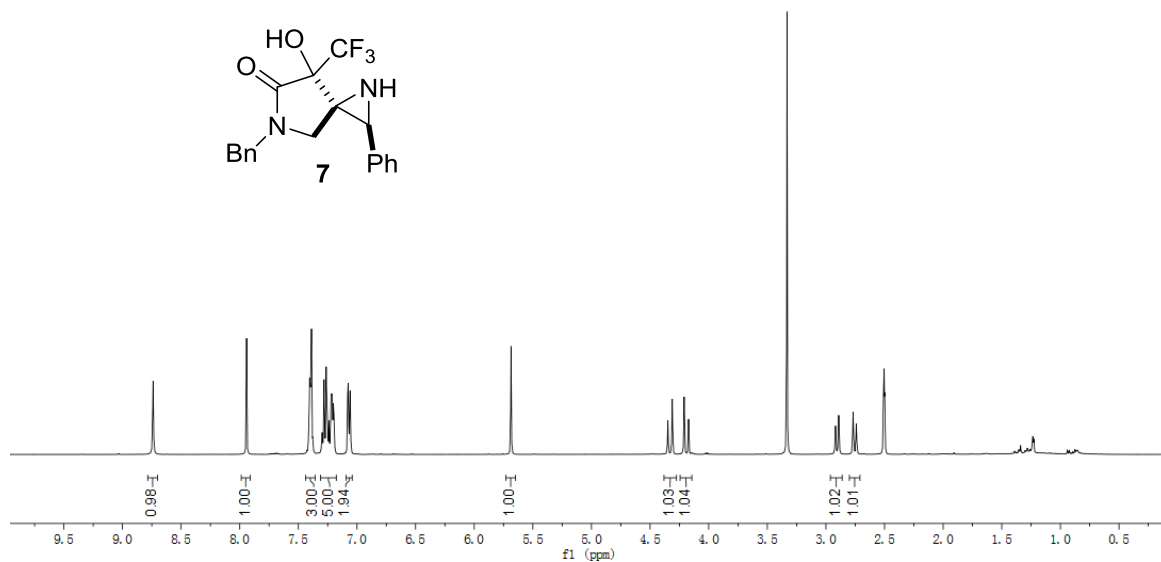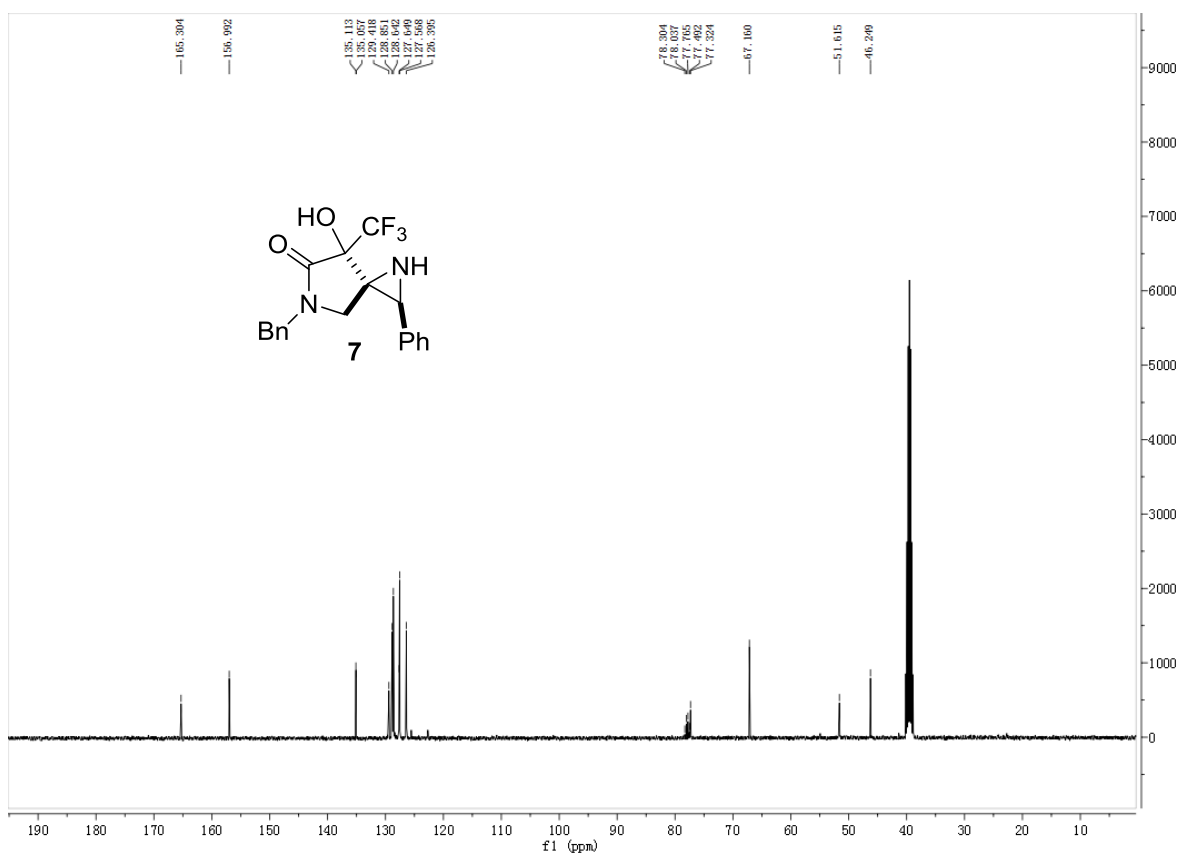

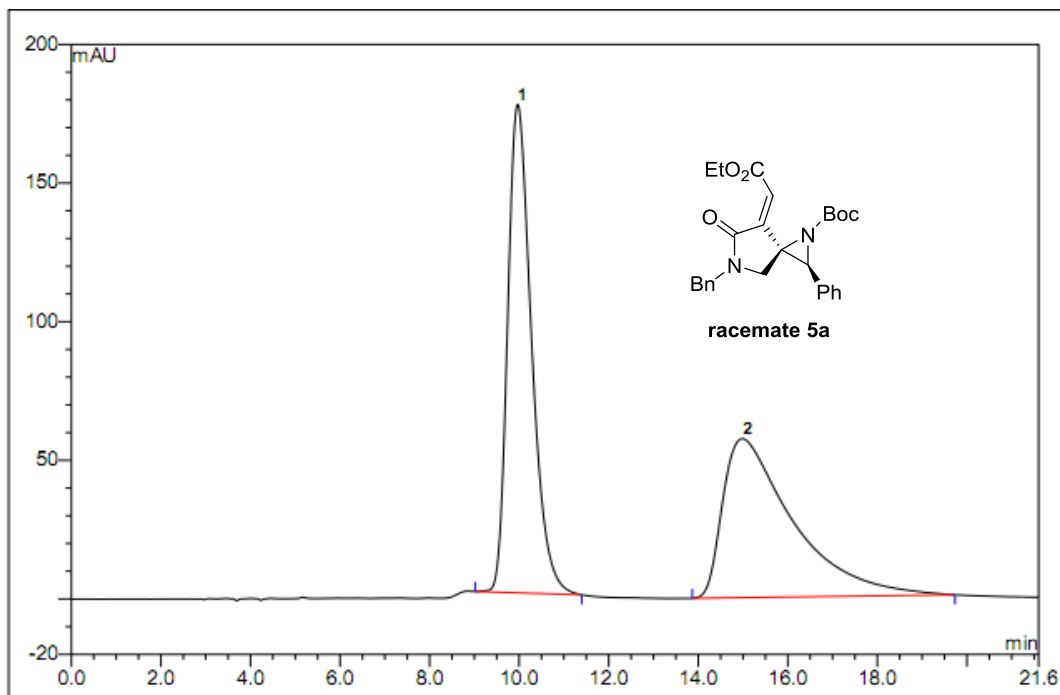

| No.           | Ret.Time<br>min | Height<br>mAU | Area<br>mAU*min | Rel.Area<br>% |
|---------------|-----------------|---------------|-----------------|---------------|
| 1             | 9.97            | 176.158       | 108.537         | 51.00         |
| 2             | 15.00           | 57.352        | 104.287         | 49.00         |
| <b>Total:</b> |                 | 233.510       | 212.824         | 100.00        |

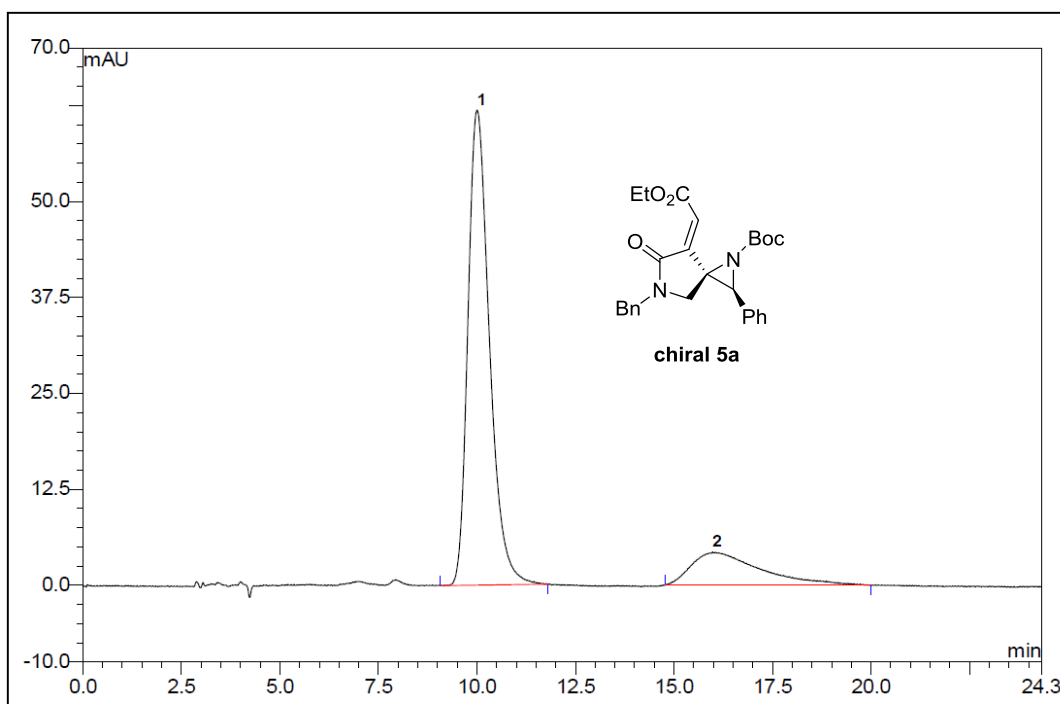

| No.           | Ret.Time<br>min | Height<br>mAU | Area<br>mAU*min | Rel.Area<br>% |
|---------------|-----------------|---------------|-----------------|---------------|
| 1             | 10.00           | 61.899        | 39.131          | 84.86         |
| 2             | 15.98           | 4.049         | 6.985           | 15.14         |
| <b>Total:</b> |                 | 65.948        | 46.116          | 100.00        |
